# Supplementary material for: Association between mental health trajectories and somatic symptoms following a second lockdown in Israel: a longitudinal study
Source: PubMed Central journal article supplement — BMJ Open. 2021 Sep 2;11(9):e050480. doi: 10.1136/bmjopen-2021-050480 (PMC8413470; doi:10.1136/bmjopen-2021-050480), 2021-09-02
Supplement: bmjopen-2021-050480.draft_revisions.pdf [file bmjopen-2021-050480.draft_revisions.pdf]

# BMJ Open

BMJ Open is committed to open peer review. As part of this commitment we make the peer review history of every article we publish publicly available.

When an article is published we post the peer reviewers' comments and the authors' responses online. We also post the versions of the paper that were used during peer review. These are the versions that the peer review comments apply to.

The versions of the paper that follow are the versions that were submitted during the peer review process. They are not the versions of record or the final published versions. They should not be cited or distributed as the published version of this manuscript.

BMJ Open is an open access journal and the full, final, typeset and author-corrected version of record of the manuscript is available on our site with no access controls, subscription charges or pay-per-view fees (<http://bmjopen.bmj.com>).

If you have any questions on BMJ Open's open peer review process please email [info.bmjopen@bmj.com](mailto:info.bmjopen@bmj.com)

# BMJ Open

## The somatic toll of a second lockdown: A prospective study

|                               |                                                                                                                                                                                                                        |
|-------------------------------|------------------------------------------------------------------------------------------------------------------------------------------------------------------------------------------------------------------------|
| Journal:                      | <i>BMJ Open</i>                                                                                                                                                                                                        |
| Manuscript ID                 | bmjopen-2021-050480                                                                                                                                                                                                    |
| Article Type:                 | Original research                                                                                                                                                                                                      |
| Date Submitted by the Author: | 20-Feb-2021                                                                                                                                                                                                            |
| Complete List of Authors:     | Ben-Ezra, Menachem; Ariel University, Social Work<br>Hamama-Raz, Yaira; Ariel University<br>Leshem, Elazar; Ariel University<br>Levin, Yafit; University of Haifa<br>Goodwin, Robin; University of Warwick, Psychology |
| Keywords:                     | COVID-19, EPIDEMIOLOGY, Anxiety disorders < PSYCHIATRY, MENTAL HEALTH                                                                                                                                                  |
|                               |                                                                                                                                                                                                                        |

SCHOLARONE™  
Manuscripts

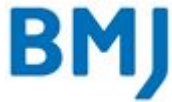

I, the Submitting Author has the right to grant and does grant on behalf of all authors of the Work (as defined in the below author licence), an exclusive licence and/or a non-exclusive licence for contributions from authors who are: i) UK Crown employees; ii) where BMJ has agreed a CC-BY licence shall apply, and/or iii) in accordance with the terms applicable for US Federal Government officers or employees acting as part of their official duties; on a worldwide, perpetual, irrevocable, royalty-free basis to BMJ Publishing Group Ltd ("BMJ") its licensees and where the relevant Journal is co-owned by BMJ to the co-owners of the Journal, to publish the Work in this journal and any other BMJ products and to exploit all rights, as set out in our [licence](#).

The Submitting Author accepts and understands that any supply made under these terms is made by BMJ to the Submitting Author unless you are acting as an employee on behalf of your employer or a postgraduate student of an affiliated institution which is paying any applicable article publishing charge ("APC") for Open Access articles. Where the Submitting Author wishes to make the Work available on an Open Access basis (and intends to pay the relevant APC), the terms of reuse of such Open Access shall be governed by a Creative Commons licence – details of these licences and which [Creative Commons](#) licence will apply to this Work are set out in our licence referred to above.

Other than as permitted in any relevant BMJ Author's Self Archiving Policies, I confirm this Work has not been accepted for publication elsewhere, is not being considered for publication elsewhere and does not duplicate material already published. I confirm all authors consent to publication of this Work and authorise the granting of this licence.

## The somatic toll of a second lockdown: A prospective study

Menachem Ben-Ezra<sup>1</sup>, Yaira Hamama-Raz<sup>1</sup>, Robin Goodwin<sup>2</sup>, Elazar Leshem<sup>1</sup>, Yafit Levin<sup>3</sup>

<sup>1</sup> School of Social Work, Ariel University, Ariel, Israel.

<sup>2</sup> Department of Psychology, University of Warwick, Coventry, UK

<sup>3</sup> School of Social Work, University of Haifa, Haifa, Israel.

Correspondence to: Prof. Menachem Ben-Ezra; menbe@ariel.ac.il

**Word count:** 3952

## ABSTRACT

**Objectives** To identify mental health prospective trajectories before and after a second lockdown during the COVID-19 pandemic and their association with subsequent somatic symptoms.

**Design** Prospective Study.

**Setting** Population based study drawn from an internet panel of 100,000 Israelis.

**Participants** Adults aged 18 years or more, representative of the adult Israeli population. The participants were measured at two time points (T1 pre-second lockdown N= 1029; Response Rate = 76.17%; T2 post-second lockdown N= 764; Response Rate = 74.24%).

**Main outcome measures** Trajectories of anxiety and adjustment disorder based on clinical cut-off score for probable diagnoses across T1-T2, Somatic symptoms at T2. The four trajectories: stable-low, (no probable diagnosis), stable-high (stable probable diagnosis), exacerbation (no probable diagnosis at T1, probable diagnosis at T2), recovery (probable diagnosis at T1, no probable diagnosis at T2).

**Results** Three anxiety trajectories predicted probable somatic symptoms (stable-high OR = 6.45; exacerbation OR = 5.38; recovery OR = 2.03) compared to the stable-low trajectory. The three adjustment disorder trajectories also predicted somatic symptoms (stable-high OR = 4.726; exacerbation OR = 6.419; recovery OR = 4.666) compared to the stable-low trajectory.

**Conclusions** Our data show the somatic toll of a second lockdown amongst those whose mental health was poor, exacerbated and those who recovered. The presentation of somatic symptoms may mask psychological vulnerabilities, even amongst those who appear to have recovered from the stressor. This indicates that any lockdown may be a double-edged sword and should be carefully administered given these population vulnerabilities.

**Key words:** COVID-19; Anxiety; Adjustment Disorders; Trajectories; Epidemiology; Mental Health

## Article Summary

### Strengths and limitations of this study

To our knowledge, this is the first study to address the impact of mental health on somatic symptoms before and after a second lockdown.

Findings are based on a large longitudinal national representative sample enabling identification of mental health trajectories.

The use of validated measures of adjustment disorder, anxiety and somatization, that do not overlap, allows us to report those trajectories of adjustment disorder and anxiety at greater risk of increased somatization.

The main weaknesses of this study are potential selection bias and the lack of measurement of somatic symptoms and mental health indices before the COVID-19 pandemic

## Introduction

From a mental health perspective, the COVID-19 pandemic can be viewed as a highly stressful event likely to lead to anxiety and stress related disorders<sup>1</sup>. Particularly interesting, however, are the specific stressors associated with a lockdown, given that such restrictions play such an important role in preventing COVID-19 outbreaks<sup>2</sup>. A number of studies have pointed to an association between a single lockdown and poorer mental health<sup>3,4</sup>. However, in some countries there was more than one lockdown. Israel was one of the first countries to apply a second lockdown, as a result of a rapid infection increase (September 18<sup>th</sup> to November 8<sup>th</sup>, 2020). The current study explored trajectories of mental health,<sup>5</sup> and the associations between these trajectories and somatic symptoms over time.

Despite the plethora of studies examining mental health during COVID-19, few studies have addressed adjustment disorder<sup>6,7</sup>. Furthermore, studies regarding the association between mental health and somatic symptoms are scarce using a general population<sup>8,9</sup>, although these are commonly reported by patients in both general population and clinical settings<sup>8</sup>. Somatic symptom burden has been related to higher age, lower education, social and economic status, and unemployment<sup>11,12</sup>. Huang et al<sup>9</sup> in China reported a prevalence of 7.59% somatic symptoms in a general population following the COVID-19 outbreak. A high somatic symptom burden has been also associated with reduced subjective health and quality of life, increased psychological distress and use of health care services<sup>10</sup>. While these studies have assessed the prevalence of adjustment disorder during the COVID-19 pandemic<sup>6,7</sup>, no study thus far has examined a lockdown-related adjustment disorder. Distinguishing this specific disorder is crucial in understanding the relative importance of such a stressor compared to general anxiety during the pandemic. Moreover, to date, no study has examined symptomatology of mental health before and after lockdowns to test for their accumulated burden. As a result, the aforementioned studies lack the prospective perspective of any change and fluctuations that might follow lockdowns.

Empirical research on how mental health and health-related behaviours have changed throughout the COVID-19 pandemic remains limited and is largely based on cross sectional data or prospective data collected before and during the pandemic. Increasing attention has been made to different groupings of responses to this global crisis. A trajectories approach used in longitudinal studies of mental health following potential stressors has identified four main outcome patterns or trajectories over time, namely chronic, recovered, delayed onset and resilient<sup>13,14</sup>. Cross-sectional diagnostic classification can easily overlook these trajectories. For example, recovery may be conflated with resilience or chronic stress depending on when it is assessed. To understand the peri- and post-implications of the COVID-19 crisis, and lockdowns in particular, prospective studies which comprise large nationally representative samples are required. Based on the trajectories approach, the current study suggests four trajectories: a 'stable-low trajectory' which included participants that did not reach the clinical cut-off of anxiety and adjustment disorder at either T1 or T2, a 'recovery trajectory' which included participants that reached full criteria of probable anxiety/probable adjustment disorder at T1, but recovered at T2 and did not reach the clinical cut-offs of anxiety/adjustment disorder; a 'stable-high trajectory' which

1  
2  
3 included participants that reached full criteria of probable anxiety/probable adjustment disorder  
4 at both T1 and T2, and an 'exacerbation trajectory', which includes participants that did not reach  
5 criteria of probable anxiety/adjustment disorder at T1 but reached full criteria of probable  
6 anxiety/probable adjustment disorder at T2. To date, we know of no prospective studies that have  
7 examined the impact of trajectories of mental health on somatic symptoms before and after a  
8 second lockdown.  
9  
10

11 The present study aims to: 1. identify prospective trajectories of anxiety and adjustment disorder  
12 before- and- after the second lockdown. 2. examine the predictive impact of anxiety and  
13 adjustment disorder during the COVID-19 crisis on somatic symptoms and the probable somatic  
14 symptoms burden after the second lockdown.  
15  
16

17 We hypothesized that lockdown related stable-high and exacerbation trajectories will be  
18 associated with greater somatic symptoms, compared to 'recovery' and 'stable-low' trajectories.  
19

## 20 **Methods**

### 21 **Recruitment and eligibility**

22 Data were collected from August 3 to August 30, 2020 for Time 1 (T1) and November 15<sup>th</sup> to  
23 December 3<sup>rd</sup> for Time 2 (T2). Eligibility criteria specified that participants should be: aged 18 or  
24 over; able to give informed consent; fluent in native language.  
25  
26  
27

### 28 **Sample size**

29 As a minimum, we estimated that 610 participants would be required to detect low-medium  
30 effect sizes of 0.20, with 90% power and a 5% significance level based on inclusion of 12  
31 explanatory variables (6 background variables and 6 trajectories that were compare to the  
32 reference group), in a logistic regression model. For the two-way ANOVA we detected a need  
33 for 523 minimum sample size, on the basis of 16 groups (4 Adjustment Disorder trajectories X 4  
34 Anxiety trajectories), low-medium effect sizes of 0.20, with 90% power and a 5% significance  
35 level. Overall, for logistic regression, a simulation study recommended a minimum sample size  
36 of 500 to derive statistics that can represent the parameters in the targeted population<sup>15</sup>.  
37  
38  
39  
40

### 41 **Procedures**

42 We used Israel's iPanel company to deploy a COVID-19 Mental Health Survey. This panel is a  
43 probability-based panel with 100,000 members designed to be representative of the adult  
44 population in Israel and changes according to the Israeli Bureau of Statistics census. This Study  
45 was conducted according to the STROBE guidelines for observational studies. The sample was  
46 administered online, and all participants signed an electronic informed consent. The study was  
47 approved by first author's Institutional Review Board. In T1, out of 1351 invitations sent, 1029  
48 responded (response rate = 76.17%); in T2, out of 1029 participants in T1 (baseline), 764  
49 responded (response rate = 74.24%). Missing data due to dropout between T1 and T2 were  
50 handled using sensitivity analysis that examined differences between participants that dropout  
51 and those that participated at both T1 and T2.  
52  
53  
54  
55  
56  
57  
58  
59  
60



## Measurements

Anxiety was measured using the Generalized Anxiety Disorder 7-item Scale (GAD-7)<sup>16</sup>. Participants indicate how often they had been bothered by each symptom over the last two weeks on a four-point Likert scale (0 = Not at all, to 3 = Nearly every day). The reliability as measured by Cronbach's alphas was high for both times: T1 ( $\alpha = .92$ ) and T2 ( $\alpha = .91$ ). Higher scores indicated higher level of anxiety (ranged score 0-21) and were divided to two categories of anxiety severity (0-9 no probable anxiety; 10-21 probable anxiety).

Adjustment disorder in the form of ICD-11 probable Adjustment Disorder (AjD) was measured using the International Adjustment Disorder Questionnaire 19-item (IADQ)<sup>17</sup>. The IADQ comprises two parts. First is a checklist of a stressors list covering different aspects of life. The second IADQ component assesses adjustment disorder core symptoms (six-items) tapping into two symptoms clusters ('preoccupation' and 'failure to adapt'), functional impairment (three-items) rated on five-point Likert scale (0 = not at all, to 4 = extremely). The tenth question assesses duration of symptoms (coded as 0 for no and 1 for yes). The algorithm for a probable diagnosis of ICD-11 adjustment disorder requires the presence of a psychosocial stressor (score  $\geq 1$  on the IADQ stressor list), at least one preoccupation symptom rated  $\geq 2$ , at least one failure-to-adapt symptom rated  $\geq 2$ , and evidence of functional impairment rated  $\geq 2$ . The reliability as measured by Cronbach's alphas in T1 ( $\alpha = .93$ ) and T2 ( $\alpha = .94$ ) were excellent.

Somatic symptoms severity was measured using the Somatic Severity Scale 8-item Scale (SSS-8)<sup>18</sup>. Respondents rate how much they were bothered by common somatic symptoms within the last seven days on a five-point Likert scale (0 = Not at all, to 4 = Very much). Higher scores indicated higher level of somatic symptoms (ranged score 0-32) and were divided into five categories of somatic severity (0-3 none-minimal; 4-7 low; 8-11 medium; 12-15 high; 16-32 very high). The reliabilities as measured by Cronbach's alphas in T1 ( $\alpha = .88$ ) and T2 ( $\alpha = .88$ ) were very good. For the purpose of this study, we used the cut-off score of  $\geq 12$  and above for indicating high somatic symptoms severity. The reliability as measured by Cronbach's alphas in T2 ( $\alpha = .83$ ) was good.

## Statistical Methods

We conducted an a-priori sensitivity analyses for each time targeting demographic variables namely age, sex, relationship status, income and education. No significant differences were found between those who answered the survey and those who did not at both T1-T2. The sample mean age was 40.75 (SD = 14.75; range 18-71) with 520 (50.5%) women, 600 (58.3%) men in a committed relationship.

The analytic plan included a descriptive epidemiological approach to depict mental health trajectories across the two assessments, before and after the second lockdown. We used the GAD-7 and IADQ cut-offs in order to determine the trajectories in the current study. Four trajectory groups were generated: (1) participants with no probable anxiety/AjD at both T1-T2 ("stable-low trajectory"); (2) participants with probable anxiety/AjD at both T1-T2 ("stable-high trajectory"); (3) participants with no probable anxiety/AjD at T1 and probable anxiety/AjD at T2 ("exacerbation trajectory"); (4) participants with probable anxiety/AjD at T1 and no probable

1  
2  
3 anxiety/AjD at T2 ("recovery trajectory"). The rates of each trajectory were identified for both  
4 anxiety and adjustment disorder. In order to show the differences between the trajectories which  
5 relied on cut offs (dichotomous scores), we present the descriptive information in figures –  
6 means of the anxiety and adjustment disorder in the continuous scored of the scales used. Then,  
7 we tested the rates of probable somatic symptoms in the different mental health trajectories. In  
8 order to characterize the trajectories with respect to demographic data, a multinomial regression  
9 on anxiety and adjustment disorder trajectories by background variables was performed.  
10  
11

12 Second, we addressed the differences between the trajectory groups for both adjustment disorder  
13 and anxiety, as well as the combination between them along with their impact on the severity of  
14 somatic complaints in T2. A two-way analysis of variance (ANOVA) was conducted. The main  
15 effects as well as the interaction effect was calculated.  
16  
17

18 Third, a logistic regression model examined the outcome variable of probable dichotomous  
19 somatic symptoms severity (T2). In the first step, age, sex, relationship status, income, and  
20 education were included in the model. Risk group membership for COVID-19 was also added to  
21 the model. In the second step, we added the trajectories  $\Delta T1-T2$  of both anxiety severity  
22 categories and ICD-11 probable AjD. We tested whether the trajectories would significantly  
23 contribute to somatic symptoms severity, compared to the stable low trajectory (reference  
24 group).  
25  
26

### 27 **Role of sponsor**

28 The study sponsor did not play a role in the study design, collection; analysis, and interpretation  
29 of data; in the writing of the report; or in the decision to submit the paper for publication.  
30  
31

## 32 **Results**

### 33 **Cohort characteristics**

34 Table 1 summarises the main characteristics of the participants, alongside comparative data on  
35 Israeli population values where available. This shows that the demographics were proportionally  
36 represented in the sample.  
37  
38  
39

### 40 **Descriptive information**

41 Prevalence of high somatic severity symptoms was 18.8% (n = 144). Four different trajectories  
42 were identified on the basis of score cut-offs for probable anxiety and probable adjustment  
43 disorder. The 'stable-low trajectory' included the majority of the sample in both anxiety (78%)  
44 and adjustment disorder (71.3%). A second trajectory had the 'recovery' course (9.0% and 8.9%  
45 respectively). Of the entire sample, 5.4% and 11.8% belonged to the 'stable-high' trajectory of  
46 anxiety and adjustment disorder. A fourth trajectory - the 'exacerbation' trajectory - included  
47 7.5% and 8% in the anxiety and adjustment disorder, respectively. The trajectories of anxiety  
48 and adjustment disorder are presented in figures 1-2.  
49  
50  
51

52 The prevalence rates of the probable somatic severity symptoms in the anxiety trajectories were  
53 11.1%, 61%, 49.1% and 36.2% among the 'stable-low', 'stable high', 'exacerbation', and 'recovery'  
54 trajectories, respectively. The prevalence rates of the probable somatic severity symptoms in the  
55  
56  
57  
58  
59  
60

adjustment disorder trajectories were 8.8%, 48.9%, 44.3% and 36.8% among the 'stable-low', 'stable high', 'exacerbation', and 'recovery' trajectories, respectively.

### **Predicting Trajectories by background variables**

A multinomial regression on anxiety trajectories by background variables showed trajectories to be predicted significantly by gender, age and risk group (Table 2). Higher age was significant in predicting the exacerbation groups compared to the stable-low group. High risk for COVID-19 contributed significantly to the high-stable trajectory group ( $b = .81$   $se = .08$   $Wald = 4.54$   $p = .033$   $OR = .446$   $CI\ 95\% .212, .937$ ), compared to the stable-low group. There were more women in the recovery group, compared to the stable-low group ( $b = -.66$   $se = .28$   $Wald = 5.42$   $p = .033$   $OR = .519$   $CI\ 95\% .298, .901$ ).

Adjustment disorder were predicted predominantly by gender and risk group. The COVID-19 risk group contributed significantly to belonging to the stable high ( $b = .58$   $se = .27$   $Wald = 4.67$   $p = .030$   $OR = .56$   $CI\ 95\% .331, .947$ ) and to the exacerbation groups ( $b = .70$   $se = .31$   $Wald = 5.09$   $p = .024$   $OR = .50$   $CI\ 95\% .272, .912$ ) compared to the stable-low group serving as the reference group. There were more women in the trajectory of stable high ( $b = -.87$   $se = .25$   $Wald = 12.51$   $p < .001$   $OR = .417$   $CI\ 95\% .257, .677$ ), and recovery groups ( $b = -.66$   $se = .22$   $Wald = 9.25$   $p = .003$   $OR = .52$   $CI\ 95\% .338, .791$ ) compared to the stable-low group.

### **Differences between the Trajectories and severity of somatic symptoms**

A two-way ANOVA showed significant main effects and non-significant interaction effects. A main effect for the anxiety trajectories demonstrated significant differences between the anxiety trajectories in the severity of somatic symptoms  $F(3, 748) = 16.723$   $p < .001$ ,  $\eta^2 = .04$ . The stable low trajectory ( $M = 8.19$   $SD = .34$ ) reported significantly lower severity of somatic symptoms compared to the stable-high ( $M = 13.38$   $SD = .93$ ), exacerbation ( $M = 12.34$   $SD = .69$ ) and recovery ( $M = 10.02$   $SD = .60$ ) trajectories. The differences between the stable-low and both the stable-high (Mean difference =  $-5.19$   $p < .001$ ) and exacerbation trajectories (Mean difference =  $-4.15$   $p < .001$ ) were greater than the difference between the stable-low and the recovery trajectory (Mean difference =  $-1.89$   $p = .050$ ).

An ANOVA for the adjustment disorder trajectories showed significant differences between the trajectories in the severity of somatic symptoms  $F(3, 760) = 17.623$   $p < .001$ ,  $\eta^2 = .05$ . The stable-low trajectory ( $M = 8.04$   $SD = .47$ ) reported significantly lower severity of somatic symptoms compared to the stable-high ( $M = 12.99$   $SD = .53$ ), exacerbation ( $M = 12.07$   $SD = .82$ ) and recovery ( $M = 10.83$   $SD = .80$ ) trajectories. The differences between the stable-low and both the stable-high (Mean difference =  $-4.96$   $p < .001$ ) and exacerbation trajectories (Mean difference =  $-4.03$   $p < .001$ ) were greater than the difference between the stable-low and the recovery trajectory (Mean difference =  $-2.79$   $p = .016$ ).

The interaction between the trajectories of Adjustment disorder and the trajectories of anxiety was not significant  $F(9, 748) = 1.467$   $p = .156$ ,  $\eta^2 = .01$ .

## The role of mental health trajectories in predicting risk for probable somatic symptoms

A logistic regression found that trajectories of both the anxiety and adjustment disorder were associated with somatic symptoms at T2 (Table 2). Participants with a stable high trajectory, exacerbation trajectory or recovery trajectory had substantially higher odds of having somatic symptoms at T2, compared to participants with a low-stable trajectory.

The odds ratio shows that participants with an exacerbation trajectory in adjustment disorder had the highest odds (OR = 6.419) of experiencing somatic symptoms at T2, compared to the other trajectories (high stable OR = 4.726 and recovery OR = 4.666), all as compared to the stable low trajectory. The statistical difference between the strength of the coefficients of the trajectories was not significant (p ranged .490 and .690).

As for the anxiety trajectories, the stable-high trajectory (OR = 6.451) and the exacerbation trajectory (OR = 5.379) had the highest odds ratio for experiencing somatic symptoms at T2, compared to the recovery trajectory that showed lower odds ratio (OR = 2.025), all compared to the group-stable low trajectory. This was reflected further in the statistical difference between the stable-high and the recovery trajectory  $t(1508) = 227$   $p = .02$  and between the exacerbation and the recovery trajectories  $t(1508) = 2.09$   $p = .036$ .

## Discussion

Several studies have suggested that mental health has deteriorated over time in many countries during the pandemic<sup>19-21</sup>. We explored trajectories of anxiety and adjustment disorder before and after the second lockdown during the COVID-19 pandemic in Israel. In line with the existing literature on responses to mass trauma, four types of mental health trajectories were identified: stable-low, stable-high, exacerbation, and recovery groups. These trajectories, with similarities in distribution, have been reported for other disorders, including PTSD<sup>22</sup>, and depression and anxiety,<sup>23-24</sup> in different populations<sup>5</sup>.

To date, we know of just one, UK-based, study that has examined trajectories of anxiety and depression over the course of the COVID-19 pandemic<sup>25</sup>. However, this UK study focused on the first lockdown only, averaging data into a single slope. Our analysis of multiple events underscored the complex and non-homogenous reactions to lockdowns. Several demographic variables predicted trajectories of response. Being female was a risk factor for more psychopathological trajectories of anxiety and adjustment disorder symptoms for the stable-high trajectory of adjustment disorder and the recovery trajectory of both anxiety and adjustment disorder. Older age was associated with lower odds of belonging to the stable-high or exacerbation trajectories compared to the stable-low trajectory. Risk group membership was associated with higher odds of belonging to the stable-high group of anxiety and adjustment disorder and to the exacerbation group of adjustment disorder.

1  
2  
3 The current study demonstrated that poor mental health (anxiety and adjustment disorder  
4 trajectories) predicted an elevated risk of somatic symptoms burden. For both anxiety and  
5 adjustment disorder, affiliation to the stable-high, exacerbation and the recovery T1-T2  
6 trajectories were significantly associated with higher risk for somatic symptoms at T2, compared  
7 to the stable-low trajectory. Important to note is that for adjustment disorder the three trajectories  
8 predicted somatic symptoms at T2 to a similar magnitude. However, for anxiety, the effect of  
9 recovery trajectory on somatic symptoms at T2 was significantly lower in magnitude from the  
10 effects of stable-high and exacerbation trajectories on somatic symptoms at that same time point.  
11 Adjustment disorder refers to a specific stressor of the lockdown and was reflected in all the  
12 three trajectories that differed from the stable-low trajectory. However, the trajectories of anxiety  
13 suggested a more general anxiety construct that is global and not stressor specific. Thus, the  
14 findings show that adjustment disorder manages to capture the consequences of lockdowns more  
15 than anxiety.  
16  
17  
18

19 In line with our hypotheses, the groups with stable-high and exacerbation trajectories (before-  
20 and after – a second lockdown) of anxiety were associated with higher somatic symptoms at T2,  
21 compared to the stable-low group. Huang and his colleagues<sup>9</sup> found in their study in China  
22 during the COVID-19 breakdown that anxious people were likely to have more somatic  
23 symptoms than people without anxiety symptoms. This was also observed through the somatic  
24 symptoms burden among those with higher vulnerability to anxiety<sup>25</sup>. Thus, stress can be  
25 expressed over time through both emotional and somatic roots, implying that researchers and  
26 clinicians should remain open minded regarding the course of symptoms of anxiety and screen  
27 for both anxiety and somatization. High stable anxiety and the elevated levels of arousal that  
28 accompany such stress conditions can change body sensations and produce physiological  
29 changes that may have implications for various symptoms and diseases<sup>26</sup>. Moreover, the  
30 COVID-19 pandemic seemed to trigger specific somatic schemata and thoughts of health/illness  
31 in particular amongst high anxious people with a more vulnerable anxiety trajectory<sup>27</sup>. Finally,  
32 amongst highly anxious individuals with a chronic and exacerbated course, there could be  
33 worries that switch between the fear of COVID-19 and the fear of other diseases (somatization),  
34 as was shown by almost an equal amount of people (about 30%) who feared an infection with  
35 COVID-19 and any other disease at the beginning of the pandemic.  
36  
37  
38  
39

40 A similar finding emerged with regard to the trajectories of Adjustment disorder; as expected,  
41 groups with chronic/stable-high and delayed/exacerbation trajectories (before- and after – a  
42 second lockdown) of AjD reported a greater somatic symptoms burden in T2 compared to the  
43 stable-low group. One possible explanation might be the multifaceted changes that the majority of  
44 society experienced due to the cumulative lockdown periods. Adaptability to such rapid and  
45 profound change has undoubtedly been a challenging process, suggesting an increase in the  
46 stress levels of many individuals associated with somatic symptoms. In line with this notion, it  
47 was found that a greater number of psychosocial stressors predict greater somatic symptoms, and  
48 that despite the somatic symptoms' high correlation with depression and anxiety, stressors  
49 predict somatic symptoms even while controlling for such variables<sup>27</sup>. In the current study items  
50 for each of the variables of adjustment disorder, anxiety, and somatic symptoms were distinct,  
51 with no overlap between them.  
52  
53  
54  
55  
56  
57  
58  
59  
60

1  
2  
3 Surprisingly, the recovery group-participants with probable mental health problems (anxiety or  
4 AjD) at T1 and no probable mental health at T2, predicted an elevated risk for a somatic  
5 symptoms burden, compared to the resilient/stable-low trajectory. One possible explanation may  
6 be related to the difference between recovery and resilient trajectories<sup>13</sup>. Hence, while recovery  
7 implies a healthy pattern, it suggests less adaptive coping as compared to the resilient stable  
8 pattern. Indeed, recovery was found to be a vulnerability point that is stress related and expressed  
9 with somatic symptoms. In line with this notion, it might be that the recovery group achieved  
10 relief from their fear and worries after the second lockdown, and were better able to cope, as they  
11 used positive cognitive emotion strategies to reduce their burden. However, it might be that the  
12 duration of employing these strategies was not sufficient as they reported higher somatic  
13 symptoms. It may be speculated that the somatic symptoms are an indicator of a vicious cycle  
14 that may develop in the future between somatization and anxiety.  
15  
16  
17

18 Overall, the present findings demonstrate the increased mental health burden associated with the  
19 second lockdown during the COVID-19 pandemic. The global crisis of COVID-19 confronts  
20 countries with further potential lockdowns. The healthcare system that administered the  
21 lockdown and the politicians and public health officials who mandated it should consider  
22 carefully the need for such action given the costs to certain vulnerable parts of the society. Our  
23 data emphasizes the importance of supporting individuals during lockdown to try to reduce  
24 distress, and also the different types of trajectories evident in response to this mass stressor. Our  
25 data also shows individuals adapt to the new strains of life in lockdown. Moreover, the present  
26 findings highlight the importance of identifying and targeting somatic symptoms as indicators for  
27 underlying mental health problems. This may be through primary health physicians who can  
28 include somatic symptoms burden screening as part of a patient's visit, especially during crises  
29 periods. This may facilitate the management of mental health problems during uncertain times  
30 such as the COVID-19 pandemic, and in doing so also save costs. From clinical perspective,  
31 interventions should thus be specific to the course of time and take into consideration the specific  
32 burden that comes with stress amongst some groups during the lifespan of a mass stressor.  
33  
34  
35

36 The findings of this study should be considered in the light of several limitations. First, we did  
37 not have pre COVID-19 assessments of mental health condition. Second, we did not measure  
38 somatic symptoms before the second lockdown was applied (T1). It could be that somatic  
39 symptoms burden exacerbated the mental health symptoms. Earlier somatization symptoms may  
40 serve as marker of later stress reactions. Finally, reliance on self-report data may liable to recall  
41 bias when assessing the occurrence of somatic symptoms.  
42  
43  
44

45 In conclusion, lockdowns should be seen as complex in terms of their medical and mental health  
46 impacts. While lockdowns prevent mass spread of infection, this may be at the cost of mental  
47 health. Our study helps to add more evidence to the argument that any lockdown is a double-  
48 edged sword.  
49  
50

51 **Acknowledgements** The authors thank the first author University's research authority for the  
52 continuous support for basic research.  
53  
54  
55  
56  
57  
58  
59

## Author Contributions

MBE, RG, YHR and YL designed the study concept. MBE RG YHR EL YL wrote the paper. MBE, YHR, EL collected the data. MBE and YL conducted the analyses. MBE, YHR, YL drafted the first version of the manuscript. RG, YHR, EL critically reviewed the manuscript and had a significant intellectual contribution. Authors read and approve the final manuscript. MBE and YL had full access to all data (including statistical reports and tables) in the study and can take responsibility for the integrity of the data and the accuracy of the data analysis.

**Funding** YHR was funded by Ariel's University Research Authority internal grant (RA2000000302).

**Competing interests** None declared.

**Patient consent for publication** Not required.

**Ethics approval** The study was approved by the Ethics Committee of Ariel University (AU-SOC-YHR-20200616).

**Data availability statement** All data relevant to the study are included in the article is available upon request to the corresponding author.

## ORCID iDs

Prof. Menachem Ben-Ezra <https://orcid.org/0000-0002-7890-2069>

Prof. Yaira Hamama-Raz <https://orcid.org/0000-0002-0496-6414>

Prof. Robin Goodwin <http://orcid.org/0000-0002-2407-7016>

Prof. Elazar Leshem <https://orcid.org/0000-0003-3782-9309>

Dr. Yafit Levin <https://orcid.org/0000-0001-5907-6569>

## References

1 Kazlauskas E, Quero S. Adjustment and coronavirus: How to prepare for COVID-19 pandemic-related adjustment disorder worldwide? *Psychol Trauma* 2020;12(S1):S22-S24.

2 Atalan A. Is the lockdown important to prevent the COVID-19 pandemic? Effects on psychology, environment and economy-perspective. *Ann Med Surg* 2020;56:38-42.

3 Ben-Ezra M, Sun S, Hou WK, *et al.* The association of being in quarantine and related COVID-19 recommended and non-recommended behaviours with psychological distress in Chinese population. *J Affect Disord* 2020;275:66–8.

- 1  
2  
3 4 Goodwin R, Hou WK, Sun S, *et al.* Psychological and behavioural responses to COVID-19: A  
4 China–Britain comparison. *J Epidemiol Community Health* 2021;75:189-192.  
5  
6  
7 5 Galatzer-Levy IR, Huang SH, Bonanno GA. Trajectories of resilience and dysfunction  
8 following potential trauma: A review and statistical evaluation. *Clin Psychol Rev* 2018;63:41–55.  
9  
10 6 Dragan M, Grajewski P, Shevlin M. Adjustment disorder, traumatic stress, depression and  
11 anxiety in Poland during an early phase of the COVID-19 pandemic. *Eur J Psychotraumatol*  
12 2021;12: 1860356.  
13  
14 7 Rossi R, Socci V, Talevi D, *et al.* COVID-19 pandemic and lockdown measures impact on  
15 mental health among the general population in Italy. *Front Psychiatry* 2020;11:790.  
16  
17 8 Shevlin M, Nolan E, Owczarek M, *et al.* COVID-19-related anxiety predicts somatic  
18 symptoms in the UK population. *Br J Health Psychol* 2020;25:875-82.  
19  
20 9 Huang Y, Wang Y, Zeng L, *et al.* Prevalence and correlation of anxiety, insomnia and somatic  
21 symptoms in a Chinese population during the COVID-19 epidemic. *Front Psychiatry*  
22 2020;11:568329.  
23  
24 10. Creed FH, Davies I, Jackson J, *et al.* The epidemiology of multiple somatic symptoms.  
25 *J Psychosom Res* 2012;72:311-7.  
26  
27 11. Hinz, A. Ernst J, Glaesmer H, *et al.* Frequency of somatic symptoms in the general  
28 population: Normative values for the Patient Health Questionnaire-15 (PHQ-15). *J Psychosom*  
29 *Res* 2017;96:27-31.  
30  
31 12 Beutel ME, Wiltink J, Kerahrodi JG, *et al.* Somatic symptom load in men and women from  
32 middle to high age in the Gutenberg Health Study-association with psychosocial and somatic  
33 factors. *Sci Rep* 2019;9:4610.  
34  
35 13. Bonanno GA. Loss, trauma, and human resilience: Have we underestimated the human  
36 capacity to thrive after extremely aversive events? *Am Psychol* 2004;59:20-8.  
37  
38 14. Bonanno GA, Wortman CB, Lehman DR, *et al.* Resilience to loss and chronic grief: a  
39 prospective study from preloss to 18-months postloss. *J Pers Soc Psychol* 2002;83:1150-64.  
40  
41 15. Demidenko E. Sample size and optimal design for logistic regression with binary interaction.  
42 *Stat Med* 2008;27:36-46.  
43  
44 16 Spitzer RL, Kroenke K, Williams JB, *et al.* A brief measure for assessing generalized anxiety  
45 disorder: the GAD-7. *Arch Intern Med* 2006;166:1092-7.  
46  
47 17 Shevlin M, Hyland P, Ben-Ezra M, *et al.* Measuring ICD-11 adjustment disorder: the  
48 development and initial validation of the International Adjustment Disorder Questionnaire. *Acta*  
49 *Psychiatr Scand* 2020;141:265-74.  
50  
51  
52  
53  
54  
55  
56  
57  
58  
59  
60



- 1  
2  
3 18 Gierk B, Kohlmann S, Kroenke K, *et al.* The somatic symptom scale-8 (SSS-8): a brief  
4 measure of somatic symptom burden. *JAMA Intern Med* 2014;174:399-407.  
5  
6  
7 19 Tay AK, Rees S, Steel Z, *et al.* Six-year trajectories of post-traumatic stress and severe  
8 psychological distress symptoms and associations with timing of trauma exposure, ongoing  
9 adversity and sense of injustice: a latent transition analysis of a community cohort in conflict-  
10 affected Timor-Leste. *BMJ Open* 2016;6:e010205.  
11  
12 20. Jia R, Ayling K, Chalder T, *et al.* Mental health in the UK during the COVID-19 pandemic:  
13 cross-sectional analyses from a community cohort study. *BMJ Open* 2020;10:e040620.  
14 21. Holmes EA, O'Connor RC, Perry VH. *et al.* Tracey, I., Wessely, S., Arseneault, L., ... &  
15 Bullmore, E. (2020). Multidisciplinary research priorities for the COVID-19 pandemic: a call for  
16 action for mental health science. *Lancet Psychiatry* 2020;7:547-60.  
17  
18  
19 22 Solomon Z, Bachem R, Levin Y, *et al.* Long-Term Trajectories of Posttraumatic Stress  
20 Disorder: Categorical versus Continuous Assessment. *Psychiatry* 2018;81:376-90.  
21  
22  
23 23 Bonanno GA, Kennedy P, Galatzer-Levy IR, *et al.* Trajectories of resilience, depression, and  
24 anxiety following spinal cord injury. *Rehabil Psychol* 2012;57:236-47.  
25  
26 24. Li G, Jiang Z, Kang X, *et al.* Trajectories and predictors of anxiety and depression amongst  
27 infertile women during their first IVF/ICSI treatment cycle. *Psychosom Res* 2021;142:110357.  
28  
29  
30 25 Fancourt D, Steptoe A, Bu F. Trajectories of anxiety and depressive symptoms during  
31 enforced isolation due to COVID-19: longitudinal analyses of 36,520 adults in England. *Lancet*  
32 *Psychiatry* 2021;8:141-9.  
33  
34 26 Ran L, Wang W, Ai M, *et al.* Psychological resilience, depression, anxiety, and somatization  
35 symptoms in response to COVID-19: A study of the general population in China at the peak of  
36 its epidemic. *Soc Sci Med* 2020;262:113261.  
37  
38  
39 27 Haftgoli N, Favrat B, Verdon F, *et al.* Patients presenting with somatic complaints in general  
40 practice: depression, anxiety and somatoform disorders are frequent and associated with  
41 psychosocial stressors. *BMC Fam Pract* 2010;11:67  
42  
43  
44  
45  
46  
47  
48  
49  
50  
51  
52  
53  
54  
55  
56  
57  
58  
59

## Tables

Table 1. Participant demographics (n = 1029) and Israeli population values

|                                   | <b>Participants<br/>(n = 1029)</b> | <b>Israel population (N = 9,291,000)</b>                    |
|-----------------------------------|------------------------------------|-------------------------------------------------------------|
|                                   | n (%)                              | n (%)                                                       |
| <b>Gender</b>                     |                                    |                                                             |
| Male                              | 509 (49.5 %)                       | 49.7%                                                       |
| Female                            | 520 (50.5%)                        | 50.3%                                                       |
| <b>Age groups (years)*</b>        |                                    |                                                             |
| 18-22                             | 180 (13.3%)                        | 10.1%                                                       |
| 23-29                             | 218 (16.1%)                        | 15.9%                                                       |
| 30-39                             | 291 (21.5%)                        | 24%                                                         |
| 40-49                             | 240 (17.8%)                        | 20%                                                         |
| 50+                               | 422 (31.2%)                        | 30%                                                         |
| <b>Education</b>                  |                                    |                                                             |
| Elementary school                 | 9 (.7%)                            | 1.9%                                                        |
| High school no diploma            | 132 (9.2)                          | 8%                                                          |
| Graduate high school with diploma | 312 (23.1%)                        | 22% ( <b>Graduate high school/ with diploma 42%</b> )       |
| higher education with no diploma  | 292 (21.6%)                        | 17%                                                         |
| undergraduate diploma             | 386 (28.6%)                        | 20% ( <b>Higher diploma - academic/not academic 50.9%</b> ) |
| post graduate diploma             | 220 (16.3%)                        | 11%                                                         |
| <b>Income</b>                     |                                    | <b>Mean income 13,558 NIS</b>                               |
| much below average                | 281 (21.1%)                        | 26.9%                                                       |
| a little below average            | 237 (17.8%)                        | NA                                                          |
| about average                     | 332 (24.9%)                        | 34.1% (based on incomes from all resources to a household)  |
| a little above average            | 355 (26.7%)                        | NA <b>above average – 28%</b>                               |
| much above average                | 127 (9.5%)                         | NA                                                          |
| <b>Marital Status</b>             |                                    |                                                             |
| Single                            | 431 (31.9%)                        | 30%                                                         |
| Married                           | 796 (58.9%)                        | 61%                                                         |
| Divorced                          | 107 (7.9%)                         | 6%                                                          |
| Separated                         | 9 (.7%)                            | 1%                                                          |
| Widowed                           | 8 (.6%)                            | 2%                                                          |
| <b>COVID-19 Risk Group</b>        |                                    |                                                             |
| Yes                               | 240 (23.3%)                        | NA                                                          |
| No                                | 789 (76.7%)                        | NA                                                          |

Notes. Israel population estimates from Office for National Statistics, end year estimates 2018.

Table 2. Logistic Regression of Factors Predicting Somatic Symptoms burden by SSS-8 (score  $\geq 12$ )

|                                                                                                                                    | n   | (%)  | b        | SE    | Wald   | p    | OR (95% C.I)          |
|------------------------------------------------------------------------------------------------------------------------------------|-----|------|----------|-------|--------|------|-----------------------|
| Age                                                                                                                                |     |      | -.00     | .01   | .49    | .486 | .994 (.978, 1.011)    |
| Sex (reference group: Men)                                                                                                         | 365 | 48.8 | .45*     | .23   | 4.02   | .045 | 1.574 (1.010, 2.454)  |
| Relationship status (reference group: not in a committed relationship)                                                             | 299 | 39.1 | -.42     | .25   | 2.92   | .088 | .654 (.402, 1.065)    |
| Education                                                                                                                          |     |      | .16      | .10   | 2.62   | .105 | 1.170 (.968, 1.416)   |
| <b>Income (Monthly Average: 2,570 GBP (reference group: much lower than average) <sup>a</sup> (n= 1014), <sup>b</sup> (n= 756)</b> | 157 | 20.5 |          |       |        |      |                       |
| A little below average                                                                                                             | 126 | 16.5 | -.10     | .34   | .09    | .764 | .903 (.463-1.759)     |
| About average                                                                                                                      | 193 | 25.3 | -.52     | .33   | 2.51   | .113 | .594 (.312-1.131)     |
| A little above average                                                                                                             | 203 | 26.6 | -.24     | .33   | .52    | .469 | .790 (.418-1.494)     |
| Much higher than average                                                                                                           | 77  | 10.1 | -.28     | .43   | .43    | .513 | .754 (.323-1.760)     |
| Being in Risk Group for COVID-19 (reference group: not in risk)                                                                    | 581 | 76.0 | -.27     | .26   | 1.08   | .298 | .761 (.454-1.274)     |
| <b>Trajectories over T1-T2</b>                                                                                                     |     |      |          |       |        |      |                       |
| <b>GAD-7 Anxiety (reference group: stable low trajectory)</b>                                                                      | 597 | 78.0 |          |       | 41.291 |      |                       |
| Stable high trajectory                                                                                                             | 41  | 5.4  | 1.864*** | 0.389 | 22.993 | .000 | 6.451 (3.011, 13.822) |
| Exacerbation trajectory                                                                                                            | 57  | 7.5  | 1.682*** | 0.333 | 25.575 | .000 | 5.379 (2.802, 10.325) |
| Recovery trajectory                                                                                                                | 69  | 9.0  | .705*    | 0.329 | 4.591  | .032 | 2.025 (1.062, 3.861)  |
| <b>ICD-11 probable Adjustment Disorder by IADQ (reference group: stable low trajectory)</b>                                        | 545 | 71.3 |          |       | 52.853 |      |                       |
| Stable high trajectory                                                                                                             | 90  | 11.8 | 1.553*** | 0.303 | 26.306 | .000 | 4.726 (2.611, 8.555)  |
| Exacerbation trajectory                                                                                                            | 61  | 8.0  | 1.859*** | 0.329 | 31.988 | .000 | 6.419 (3.370, 12.227) |
| Recovery trajectory                                                                                                                | 68  | 8.9  | 1.540*** | 0.320 | 23.161 | .000 | 4.666 (2.492, 8.739)  |

Note: \*  $p \leq .05$ ; \*\*  $p \leq .01$ ; \*\*\*  $p \leq .001$ . <sup>a</sup>Actual n = 1014; <sup>b</sup>Actual n = 756.

SSS = Somatic Severity Scale; GAD= General Anxiety disorder; IADQ = International Adjustment Disorder Questionnaire.

Figure 1. Trajectories of Anxiety symptoms over time

Notes. Four different trajectories were identified for probable anxiety

| 'Stable-low trajectory' | 'Recovery' trajectory | 'Stable-high' | 'Exacerbation' trajectory |
|-------------------------|-----------------------|---------------|---------------------------|
| 78%                     | 9.0%                  | 5.4%          | 7.5%                      |

Figure 2. Trajectories of Adjustment disorder symptoms over time

Notes. Four different trajectories were identified for probable anxiety

| 'Stable-low trajectory' | 'Recovery' trajectory | 'Stable-high' | 'Exacerbation' trajectory |
|-------------------------|-----------------------|---------------|---------------------------|
| 80.4%                   | 8.4%                  | 6.7%          | 4.5%                      |

1  
2  
3  
4  
5  
6  
7  
8  
9  
10  
11  
12  
13  
14  
15  
16  
17  
18  
19  
20  
21  
22  
23  
24  
25  
26  
27  
28  
29  
30  
31  
32  
33  
34  
35  
36  
37  
38  
39  
40  
41  
42  
43  
44  
45  
46  
47  
48  
49  
50  
51  
52  
53  
54  
55  
56  
57  
58  
59  
60

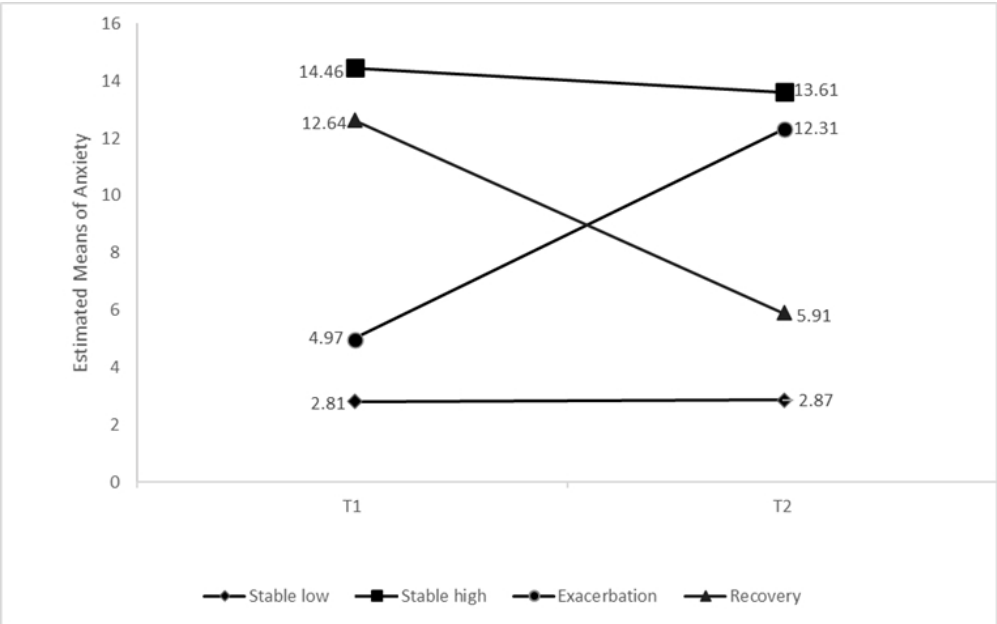

Figure 1. Trajectories of Anxiety symptoms over time

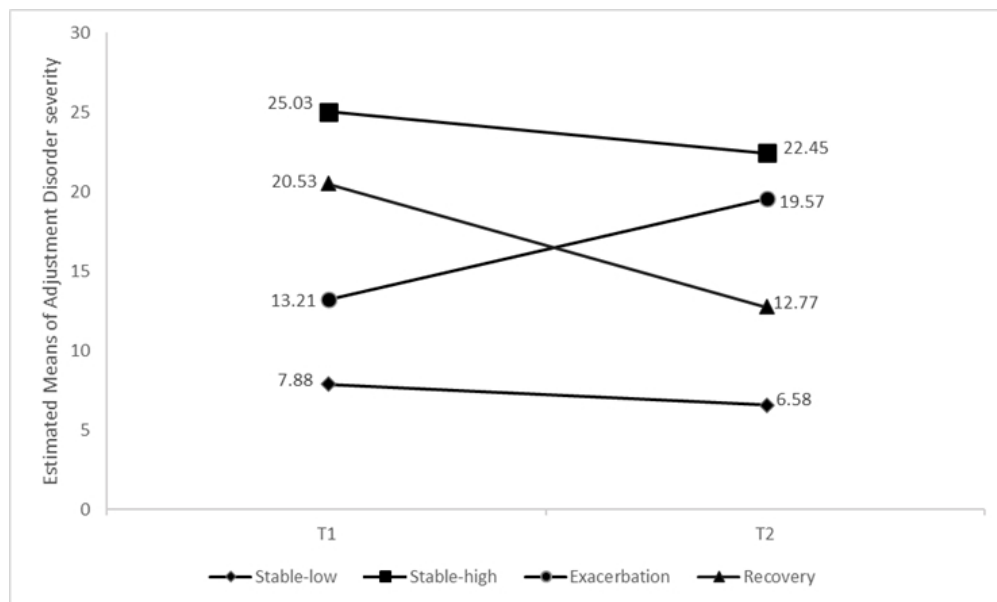

Figure 2. Trajectories of Adjustment disorder symptoms over time

**STROBE 2007 (v4) Statement—Checklist of items that should be included in reports of *cohort studies***

| Section/Topic                | Item # | Recommendation                                                                                                                                                                       | Reported on page # |
|------------------------------|--------|--------------------------------------------------------------------------------------------------------------------------------------------------------------------------------------|--------------------|
| <b>Title and abstract</b>    | 1      | (a) Indicate the study's design with a commonly used term in the title or the abstract                                                                                               | 1                  |
|                              |        | (b) Provide in the abstract an informative and balanced summary of what was done and what was found                                                                                  | 2                  |
| <b>Introduction</b>          |        |                                                                                                                                                                                      |                    |
| Background/rationale         | 2      | Explain the scientific background and rationale for the investigation being reported                                                                                                 | 3-4                |
| Objectives                   | 3      | State specific objectives, including any prespecified hypotheses                                                                                                                     | 4                  |
| <b>Methods</b>               |        |                                                                                                                                                                                      |                    |
| Study design                 | 4      | Present key elements of study design early in the paper                                                                                                                              | 4                  |
| Setting                      | 5      | Describe the setting, locations, and relevant dates, including periods of recruitment, exposure, follow-up, and data collection                                                      | 4                  |
| Participants                 | 6      | (a) Give the eligibility criteria, and the sources and methods of selection of participants. Describe methods of follow-up                                                           | 4-5 (Yafit)        |
|                              |        | (b) For matched studies, give matching criteria and number of exposed and unexposed                                                                                                  |                    |
| Variables                    | 7      | Clearly define all outcomes, exposures, predictors, potential confounders, and effect modifiers. Give diagnostic criteria, if applicable                                             | 5-6                |
| Data sources/<br>measurement | 8*     | For each variable of interest, give sources of data and details of methods of assessment (measurement). Describe comparability of assessment methods if there is more than one group | 5-6                |
| Bias                         | 9      | Describe any efforts to address potential sources of bias                                                                                                                            | Yafit              |
| Study size                   | 10     | Explain how the study size was arrived at                                                                                                                                            | Yafit              |
| Quantitative variables       | 11     | Explain how quantitative variables were handled in the analyses. If applicable, describe which groupings were chosen and why                                                         |                    |
| Statistical methods          | 12     | (a) Describe all statistical methods, including those used to control for confounding                                                                                                | 5-6                |
|                              |        | (b) Describe any methods used to examine subgroups and interactions                                                                                                                  | 5-6                |
|                              |        | (c) Explain how missing data were addressed                                                                                                                                          | 5-6                |
|                              |        | (d) If applicable, explain how loss to follow-up was addressed                                                                                                                       | 5-6                |
|                              |        | (e) Describe any sensitivity analyses                                                                                                                                                | 5-6                |
| <b>Results</b>               |        |                                                                                                                                                                                      |                    |

|                          |     |                                                                                                                                                                                                              |                                                              |
|--------------------------|-----|--------------------------------------------------------------------------------------------------------------------------------------------------------------------------------------------------------------|--------------------------------------------------------------|
| Participants             | 13* | (a) Report numbers of individuals at each stage of study—eg numbers potentially eligible, examined for eligibility, confirmed eligible, included in the study, completing follow-up, and analysed            | Yafit (page 4?)                                              |
|                          |     | (b) Give reasons for non-participation at each stage                                                                                                                                                         | Yafit (page4 ?)                                              |
|                          |     | (c) Consider use of a flow diagram                                                                                                                                                                           | No Need                                                      |
| Descriptive data         | 14* | (a) Give characteristics of study participants (eg demographic, clinical, social) and information on exposures and potential confounders                                                                     | Yafit                                                        |
|                          |     | (b) Indicate number of participants with missing data for each variable of interest                                                                                                                          | Yafit (we have it in table 1) Maybe should add to the paper? |
|                          |     | (c) Summarise follow-up time (eg, average and total amount)                                                                                                                                                  | Yafit                                                        |
| Outcome data             | 15* | Report numbers of outcome events or summary measures over time                                                                                                                                               |                                                              |
| Main results             | 16  | (a) Give unadjusted estimates and, if applicable, confounder-adjusted estimates and their precision (eg, 95% confidence interval). Make clear which confounders were adjusted for and why they were included | Yafit                                                        |
|                          |     | (b) Report category boundaries when continuous variables were categorized                                                                                                                                    | Yafit                                                        |
|                          |     | (c) If relevant, consider translating estimates of relative risk into absolute risk for a meaningful time period                                                                                             | Yafit                                                        |
| Other analyses           | 17  | Report other analyses done—eg analyses of subgroups and interactions, and sensitivity analyses                                                                                                               | Yafit (Page 4?)                                              |
| <b>Discussion</b>        |     |                                                                                                                                                                                                              |                                                              |
| Key results              | 18  | Summarise key results with reference to study objectives                                                                                                                                                     | Page 7-8                                                     |
| <b>Limitations</b>       |     |                                                                                                                                                                                                              |                                                              |
| Interpretation           | 20  | Give a cautious overall interpretation of results considering objectives, limitations, multiplicity of analyses, results from similar studies, and other relevant evidence                                   | Page 8                                                       |
| Generalisability         | 21  | Discuss the generalisability (external validity) of the study results                                                                                                                                        | Page 8                                                       |
| <b>Other information</b> |     |                                                                                                                                                                                                              |                                                              |
| Funding                  | 22  | Give the source of funding and the role of the funders for the present study and, if applicable, for the original study on which the present article is based                                                | Page 8-9                                                     |

\*Give information separately for cases and controls in case-control studies and, if applicable, for exposed and unexposed groups in cohort and cross-sectional studies.



1  
2  
3  
4  
5  
6  
7  
8  
9  
10  
11  
12  
13  
14  
15  
16  
17  
18  
19  
20  
21  
22  
23  
24  
25  
26  
27  
28  
29  
30  
31  
32  
33  
34  
35  
36  
37  
38  
39  
40  
41  
42  
43  
44  
45  
46

**Note:** An Explanation and Elaboration article discusses each checklist item and gives methodological background and published examples of transparent reporting. The STROBE checklist is best used in conjunction with this article (freely available on the Web sites of PLoS Medicine at <http://www.plosmedicine.org/>, Annals of Internal Medicine at <http://www.annals.org/>, and Epidemiology at <http://www.epidem.com/>). Information on the STROBE Initiative is available at [www.strobe-statement.org](http://www.strobe-statement.org).

For peer review only

# BMJ Open

## The association between mental health trajectories and somatic symptoms following a second lockdown in Israel: A longitudinal study

|                                 |                                                                                                                                                                                                                        |
|---------------------------------|------------------------------------------------------------------------------------------------------------------------------------------------------------------------------------------------------------------------|
| Journal:                        | <i>BMJ Open</i>                                                                                                                                                                                                        |
| Manuscript ID                   | bmjopen-2021-050480.R1                                                                                                                                                                                                 |
| Article Type:                   | Original research                                                                                                                                                                                                      |
| Date Submitted by the Author:   | 06-Jul-2021                                                                                                                                                                                                            |
| Complete List of Authors:       | Ben-Ezra, Menachem; Ariel University, Social Work<br>Hamama-Raz, Yaira; Ariel University<br>Goodwin, Robin; University of Warwick, Psychology<br>Leshem, Elazar; Ariel University<br>Levin, Yafit; University of Haifa |
| <b>Primary Subject Heading</b>: | Epidemiology                                                                                                                                                                                                           |
| Secondary Subject Heading:      | Mental health, Epidemiology                                                                                                                                                                                            |
| Keywords:                       | COVID-19, EPIDEMIOLOGY, Anxiety disorders < PSYCHIATRY, MENTAL HEALTH                                                                                                                                                  |
|                                 |                                                                                                                                                                                                                        |

SCHOLARONE™  
Manuscripts

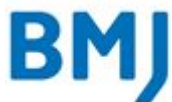

I, the Submitting Author has the right to grant and does grant on behalf of all authors of the Work (as defined in the below author licence), an exclusive licence and/or a non-exclusive licence for contributions from authors who are: i) UK Crown employees; ii) where BMJ has agreed a CC-BY licence shall apply, and/or iii) in accordance with the terms applicable for US Federal Government officers or employees acting as part of their official duties; on a worldwide, perpetual, irrevocable, royalty-free basis to BMJ Publishing Group Ltd ("BMJ") its licensees and where the relevant Journal is co-owned by BMJ to the co-owners of the Journal, to publish the Work in this journal and any other BMJ products and to exploit all rights, as set out in our [licence](#).

The Submitting Author accepts and understands that any supply made under these terms is made by BMJ to the Submitting Author unless you are acting as an employee on behalf of your employer or a postgraduate student of an affiliated institution which is paying any applicable article publishing charge ("APC") for Open Access articles. Where the Submitting Author wishes to make the Work available on an Open Access basis (and intends to pay the relevant APC), the terms of reuse of such Open Access shall be governed by a Creative Commons licence – details of these licences and which [Creative Commons](#) licence will apply to this Work are set out in our licence referred to above.

Other than as permitted in any relevant BMJ Author's Self Archiving Policies, I confirm this Work has not been accepted for publication elsewhere, is not being considered for publication elsewhere and does not duplicate material already published. I confirm all authors consent to publication of this Work and authorise the granting of this licence.

1  
2  
3 **The association between mental health trajectories and somatic symptoms**  
4 **following a second lockdown in Israel: A longitudinal study**  
5  
6  
7

8 **Menachem Ben-Ezra<sup>1\*</sup>, Yaira Hamama-Raz<sup>1</sup>, Robin Goodwin<sup>2</sup>, Elazar Leshem<sup>1</sup>, Yafit**  
9 **Levin<sup>3</sup>**  
10  
11

12  
13  
14 <sup>1</sup> School of Social Work, Ariel University, Ariel, Israel.

15 <sup>2</sup> Department of Psychology, University of Warwick, Coventry, UK

16 <sup>3</sup> School of Education, Ariel University, Ariel, Israel.

17 \*Correspondence to: Prof. Menachem Ben-Ezra; menbe@ariel.ac.il  
18  
19  
20  
21  
22

23 **Word count:** 4996  
24  
25  
26  
27  
28  
29  
30  
31  
32  
33  
34  
35  
36  
37  
38  
39  
40  
41  
42  
43  
44  
45  
46  
47  
48  
49  
50  
51  
52  
53  
54  
55  
56  
57  
58  
59  
60

## ABSTRACT

**Objectives** To identify mental health prospective trajectories before and after a second lockdown during the COVID-19 pandemic and their associations with somatic symptoms.

**Design** Prospective Study.

**Setting** Population based study drawn from a probability-based internet panel of over 100,000 Israelis.

**Participants** Adults aged 18 years or more, representative of the adult Israeli population. The participants were measured at two time points (T1 pre-second lockdown N= 1029; Response Rate = 76.17%; T2 post-second lockdown N= 764; Response Rate = 74.24%).

**Main outcome measures** Trajectories of anxiety and adjustment disorder based on clinical cut-off score for probable diagnoses across T1-T2, Somatic symptoms at T2. The four trajectories: stable-low, (no probable diagnosis), stable-high (stable probable diagnosis), exacerbation (no probable diagnosis at T1, probable diagnosis at T2), recovery (probable diagnosis at T1, no probable diagnosis at T2).

**Results** Three anxiety trajectories predicted probable somatic symptoms (stable-high OR = 6.45; exacerbation OR = 5.38; recovery OR = 2.03) compared to the stable-low trajectory. The three adjustment disorder trajectories also predicted somatic symptoms (stable-high OR = 4.726; exacerbation OR = 6.419; recovery OR = 4.666) compared to the stable-low trajectory.

**Conclusions** Our data show elevated somatic symptoms amongst those whose mental health trajectories were poor, exacerbated and those who recovered following the second lockdown. The presentation of somatic symptoms may mask psychological vulnerabilities, even amongst those who appear to have recovered from the stressor. This indicates that lockdown may be a double-edged sword and should be carefully administered given these populations vulnerabilities.

**Key words:** COVID-19; Anxiety; Adjustment Disorder; Trajectories; Epidemiology; Mental Health

## Article Summary

### Strengths and limitations of this study

To our knowledge, this is the first study to address the association of mental health trajectories with somatic symptoms before and after a second lockdown.

The survey used a robust quota sampling method representative of the Israeli adult population based on age and sex.

Findings are based on a large longitudinal national representative sample enabling identification of mental health trajectories.

The use of unrelated robust and validated measures of adjustment disorder, anxiety and somatization allows us to report those trajectories of adjustment disorder and anxiety at higher risk of increased somatic symptoms.

The main weaknesses of this study are potential selection bias and the lack of measurement of somatic symptoms and mental health indices before the COVID-19 pandemic.

## Introduction

From a mental health perspective, the COVID-19 pandemic can be viewed as a highly stressful event likely to lead to anxiety and stress related disorders [1]. Particularly interesting, however, are the specific stressors associated with a lockdown, given that such restrictions play such an important role in preventing COVID-19 outbreaks [2]. Several studies have pointed to an association between a single lockdown and poorer mental health [3, 4]. However, in some countries there was more than one lockdown. Israel was one of the first countries to apply a second lockdown, as a result of a rapid infection increase (September 18<sup>th</sup> to November 8<sup>th</sup>, 2020). The current study explored trajectories of mental health, [5] and the associations between these trajectories and somatic symptoms over time.

Despite the plethora of studies examining mental health during COVID-19, few studies have addressed adjustment disorder [6, 7]. Furthermore, studies regarding the association between mental health and somatic symptoms are scarce using a general population [8, 9], although these are commonly reported by patients in both general population and clinical settings [8]. Somatic symptom burden has been related to higher age, lower education, social and economic status, and unemployment [10-12]. Huang et al [9] in China reported a prevalence of 7.59% somatic symptoms in a general population following the COVID-19 outbreak. A high somatic symptom burden has been also associated with reduced subjective health and quality of life, increased psychological distress and use of health care services [12]. While these studies have assessed the prevalence of adjustment disorder during the COVID-19 pandemic [6, 7], no study thus far has examined a lockdown-related adjustment disorder. Distinguishing this specific disorder is crucial in understanding the relative importance of such a stressor compared to general anxiety during the pandemic. Moreover, to date, no study has examined symptomatology of mental health before and after lockdowns to test for their accumulated burden. As a result, the aforementioned studies lack the prospective perspective of any change and fluctuations that might follow lockdowns.

Empirical research on how mental health and health-related behaviours have changed throughout the COVID-19 pandemic remains limited and is largely based on cross sectional data or very narrow prospective data collected before and during the pandemic. Increasing attention has been made to different groupings of responses to this global crisis. A trajectories approach used in longitudinal studies of mental health following potential stressors has identified four main outcome patterns or trajectories over time, namely chronic, recovered, delayed onset and resilient [13, 14]. Cross-sectional diagnostic classification can easily overlook these trajectories. For example, recovery may be conflated with resilience or chronic stress depending on when it is assessed. To understand the peri- and post-implications of the COVID-19 crisis, and lockdowns in particular, prospective studies which comprise large nationally representative samples are required. Based on the trajectories approach, the current study suggests four trajectories: a 'stable-low trajectory' which included participants that did not reach the clinical cut-off of anxiety and adjustment disorder at either T1 or T2, a 'recovery trajectory' which included participants that reached full criteria of probable anxiety/probable adjustment disorder at T1, but

1  
2  
3 recovered at T2 and did not reach the clinical cut-offs of anxiety/adjustment disorder; a 'stable-  
4 high trajectory' which included participants that reached full criteria of probable anxiety/probable  
5 adjustment disorder at both T1 and T2, and an 'exacerbation trajectory', which includes  
6 participants that did not reach criteria of probable anxiety/adjustment disorder at T1 but reached  
7 full criteria of probable anxiety/probable adjustment disorder at T2. To date, we know of no  
8 prospective studies that have examined the impact of trajectories of mental health on somatic  
9 symptoms before and after a second lockdown.  
10  
11

12 This study has several novel characteristics. First it is the first study to estimate mental health  
13 before and after a second lockdown. Second, this is one of the first studies to measure trajectories  
14 of adjustment disorder based on the newly published ICD-11. Thirdly, this is one of the first  
15 studies to measure the association between trajectories of mental health and somatic symptoms.  
16  
17

18 The present study aims to: 1. identify prospective trajectories of anxiety and adjustment disorder  
19 before- and- after the second lockdown. 2. examine the associations of anxiety and adjustment  
20 disorder during the COVID-19 crisis with somatic symptoms and probable somatic symptoms  
21 after the second lockdown.  
22  
23

24 We hypothesized that lockdown related stable-high and exacerbation trajectories will be  
25 associated with greater somatic symptoms, compared to 'recovery' and 'stable-low' trajectories.  
26

## 27 **Methods**

### 28 **Recruitment and eligibility**

29 Data were collected from August 3 to August 30, 2020 for Time 1 (T1) and November 15<sup>th</sup> to  
30 December 3<sup>rd</sup> for Time 2 (T2). Eligibility criteria specified that participants should be: aged 18 or  
31 over; Israeli residents at the time the survey was conducted; able to give informed consent; fluent  
32 in native language.  
33  
34  
35

### 36 **Sample size**

37 As a minimum, we estimated that 610 participants would be required to detect low-medium  
38 effect sizes of 0.20, with 90% power and a 5% significance level based on inclusion of 12  
39 explanatory variables (six background variables and 6 trajectories that were compared to the  
40 reference group), in a logistic regression model. For the two-way ANOVA we detected a need  
41 for a 523 minimum sample size, on the basis of 16 groups (4 adjustment disorder trajectories X 4  
42 anxiety trajectories), low-medium effect sizes of 0.20, with 90% power and a 5% significance  
43 level. Overall, for logistic regression, a simulation study recommended a minimum sample size  
44 of 500 to derive statistics that can represent the parameters in the targeted population [15].  
45  
46  
47  
48

### 49 **Sampling and Procedures**

50 The study was conducted according to the STROBE guidelines for observational studies.  
51  
52

53 We used Israel's iPanel company to deploy the COVID-19 Mental Health Survey. This panel is a  
54 probability-based panel with over 100,000 members [16]. The panels consist of adults aged 18–  
55  
56  
57  
58  
59  
60



85 who have given their consent to be contacted about surveys. Panel recruitment is dynamic and constant using a range of online methods.

iPanel adheres to the stringent standards of the world association for market, social, and opinion researchers (ESOMAR). From this panel, we recruited participants aged 18-71.

A quota sampling approach was used with quotas meeting the Israeli national census data on age and sex, as specified by the Israeli Bureau of Statistics census data. The use of this approach ensured that a good representation of the adult population in Israel. After the quotas and required sample size were reached, the survey was closed.

The final data set was weighted according to these factors (age and sex) to enable the study to be considered representative of the internet-using participants of 18–71 years living in Israel.

The sample was administered online, and all participants signed an electronic informed consent. The study was approved by first author's Institutional Review Board. At T1, out of 1351 invitations sent, 1029 responded (response rate = 76.17%); at T2, out of 1029 participants in T1 (baseline), 764 responded (response rate = 74.24%). We conducted a set of sensitivity analyses at T1 comparing those who did answer the survey to those who did not ( $n = 322$ ) on the following key demographic factors age ( $t(1049) = 1.10$   $p = .271$ ), sex ( $\chi^2(1) = 2.65$   $p = .104$ ), marital status ( $\chi^2(4) = 1.33$   $p = .856$ ), income ( $\chi^2(4) = 2.77$   $p = .594$ ), and education ( $\chi^2(5) = 6.84$   $p = .145$ ). No differences were found between the groups.

## Measurements

Demographic variables were age (Mean = 40.75; SD = 14.75; range 18-71), Sex coded men as '1' women as '2' (50.5% of the sample,  $n = 520$ ). Most of the participants were in a committed relationship (58.3% of the sample,  $n = 600$ ) coded as '1' for single, '2' for committed relationship, '3' for divorced, '4' for separated and '5' for widowed. Education was coded as '1' for elementary school, '2' for high school without diploma, '3' for high school graduate with diploma, '4' for higher education with no diploma, '5' for undergraduate diploma and '6' for post graduate diploma. Income was measured by the following question: "The average monthly income in Israel in August 2020 was 13,558 NIS (2,570 GBP). Please rate your income in comparison". The rating was done on a five-point Likert scale coded as '1' much below average, '2' a little below average, '3' about the average, '4' a little above the average and '5' much above average.

Risk group for COVID-19 was measured by the following question: "do you suffer from one of the following medical conditions: (hypertension, diabetes, cardiovascular disease, chronic respiratory disease, chronic obstructive pulmonary disease and cancer). The list was composed according to the WHO and US CDC. Being in a risk group for COVID-19 was coded as '1' for being a in risk group for COVID-19 and '2' for being in non-risk group for COVID-19. For elaborated demographics, please see Table 1.

Anxiety was measured using the Generalized Anxiety Disorder 7-item Scale (GAD-7) [17]. Participants indicate how often they had been bothered by each symptom over the last two weeks on a four-point Likert scale (0 = Not at all, to 3 = Nearly every day). The reliability as measured

1  
2  
3 by Cronbach's alphas was high for both times: T1 ( $\alpha = .92$ ) and T2 ( $\alpha = .91$ ). Higher scores  
4 indicated higher level of anxiety (ranged score 0-21) and were divided to two categories of  
5 anxiety severity (0-9 no probable anxiety; 10-21 probable anxiety).  
6  
7

8 Adjustment disorder in the form of ICD-11 probable adjustment disorder was measured using the  
9 International Adjustment Disorder Questionnaire 19-item (IADQ) [18]. The IADQ comprises  
10 two parts. First is a checklist of a stressors list covering different aspects of life. The second  
11 IADQ component assesses adjustment disorder core symptoms (six-items) tapping into two  
12 symptoms clusters ('preoccupation' and 'failure to adapt'), functional impairment (three-items)  
13 rated on five-point Likert scale (0 = not at all, to 4 = extremely). The tenth question assesses  
14 duration of symptoms (coded as 0 for no and 1 for yes). The algorithm for a probable diagnosis  
15 of ICD-11 adjustment disorder requires the presence of a psychosocial stressor (score  $\geq 1$  on the  
16 IADQ stressor list), at least one preoccupation symptom rated  $\geq 2$ , at least one failure-to-adapt  
17 symptom rated  $\geq 2$ , and evidence of functional impairment rated  $\geq 2$ . The reliability as measured  
18 by Cronbach's alphas in T1 ( $\alpha = .93$ ) and T2 ( $\alpha = .94$ ) were excellent.  
19  
20

21 Somatic symptoms severity was measured using the Somatic Severity Scale 8-item Scale (SSS-  
22 8) [19]. Respondents rated how much they were bothered by common somatic symptoms within  
23 the last seven days on a five-point Likert scale (0 = Not at all, to 4 = Very much). Higher scores  
24 indicated higher level of somatic symptoms (ranged score 0-32) and were divided into five  
25 categories of somatic severity (0-3 none-minimal; 4-7 low; 8-11 medium; 12-15 high; 16-32 very  
26 high). The reliabilities as measured by Cronbach's alphas in T1 ( $\alpha = .88$ ) and T2 ( $\alpha = .88$ ) were  
27 very good. For the purpose of this study, we used the cut-off score of  $\geq 12$  and above for  
28 indicating high somatic symptoms severity. The reliability as measured by Cronbach's alphas in  
29 T2 ( $\alpha = .83$ ) was good.  
30  
31  
32

### 33 **Statistical Methods**

34  
35 Following the conducted an a-priori sensitivity analyses targeting demographic variables namely  
36 age, sex, relationship status, income and education showing no significant differences were  
37 found between those who answered the survey and those who did not.  
38  
39

40 The analytic plan included a descriptive epidemiological approach to depict mental health  
41 trajectories across the two assessments, before and after the second lockdown. We used the  
42 GAD-7 and IADQ cut-offs in order to determine the trajectories in the current study. Four  
43 trajectory groups were generated: (1) participants with no probable anxiety/adjustment disorder  
44 at both T1-T2 ("stable-low trajectory"); (2) participants with probable anxiety/adjustment  
45 disorder at both T1-T2 ("stable-high trajectory"); (3) participants with no probable  
46 anxiety/adjustment disorder at T1 and probable anxiety/adjustment disorder at T2 ("exacerbation  
47 trajectory"); (4) participants with probable anxiety/adjustment disorder at T1 and no probable  
48 anxiety/adjustment disorder at T2 ("recovery trajectory"). The rates of each trajectory were  
49 identified for both anxiety and adjustment disorder. In order to show the differences between the  
50 trajectories which relied on cut offs (dichotomous scores), we present the descriptive information  
51 in figures – means of the anxiety and adjustment disorder in the continuous scored of the scales  
52 used. Then, we tested the rates of probable somatic symptoms in the different mental health  
53 trajectories. In order to characterize the trajectories with respect to demographic data, a  
54  
55  
56  
57  
58  
59  
60

1  
2  
3 multinomial regression on anxiety and adjustment disorder trajectories by background variables  
4 was performed.  
5

6  
7 Second, we addressed the differences between the trajectory groups for both adjustment disorder  
8 and anxiety, as well as the combination between them along with their impact on the severity of  
9 somatic complaints in T2. A two-way analysis of variance (ANOVA) was conducted. The main  
10 effects as well as the interaction effect was calculated.  
11

12 Third, a logistic regression model examined the outcome variable of probable dichotomous  
13 somatic symptoms severity (T2). In the first step, age, sex, relationship status, income, and  
14 education were included in the model. Risk group membership for COVID-19 was also added to  
15 the model. In the second step, we added the trajectories  $\Delta T1-T2$  of both anxiety severity  
16 categories and ICD-11 probable adjustment disorder. We tested whether the trajectories would  
17 significantly contribute to somatic symptoms severity, compared to the stable low trajectory  
18 (reference group).  
19  
20

### 21 **Role of sponsor**

22 The study sponsor did not play a role in the study design, collection; analysis, and interpretation  
23 of data; in the writing of the report; or in the decision to submit the paper for publication.  
24  
25

### 26 **Patient and Public Involvement**

27 No patient involved.  
28  
29

## 30 **Results**

### 31 **Cohort characteristics**

32 Table 1 summarises the main characteristics of the participants, alongside comparative data on  
33 Israeli population values where available. This shows that the demographics were proportionally  
34 represented in the sample.  
35  
36  
37

### 38 **Descriptive information**

39 Prevalence of high somatic severity symptoms was 18.8% (n = 144). Four different trajectories  
40 were identified on the basis of score cut-offs for probable anxiety and probable adjustment  
41 disorder. The 'stable-low trajectory' included the majority of the sample in both anxiety (78%)  
42 and adjustment disorder (71.3%). A second trajectory had the 'recovery' course (9.0% and 8.9%  
43 respectively). Of the entire sample, 5.4% and 11.8% belonged to the 'stable-high' trajectory of  
44 anxiety and adjustment disorder. A fourth trajectory - the 'exacerbation' trajectory - included  
45 7.5% and 8% in the anxiety and adjustment disorder, respectively. The trajectories of anxiety  
46 and adjustment disorder are presented in figures 1 & 2.  
47  
48  
49

50 The prevalence rates of the probable somatic severity symptoms in the anxiety trajectories were  
51 11.1%, 61%, 49.1% and 36.2% among the 'stable-low', 'stable high', 'exacerbation', and 'recovery'  
52 trajectories, respectively. The prevalence rates of the probable somatic severity symptoms in the  
53 adjustment disorder trajectories were 8.8%, 48.9%, 44.3% and 36.8% among the 'stable-low',  
54 'stable high', 'exacerbation', and 'recovery' trajectories, respectively.  
55  
56  
57  
58  
59  
60

## Predicting Trajectories by background variables

A multinomial regression on anxiety trajectories by background variables showed trajectories to be predicted significantly by sex, age and risk group, See Table 2. Higher age was significant in predicting the exacerbation groups compared to the stable-low group. High risk for COVID-19 contributed significantly to the high-stable trajectory group ( $b = 0.81$ ,  $se = 0.08$ ,  $Wald = 4.54$ ,  $p = 0.033$ , odds ratio (OR) 0.446, 95% confidence interval (CI) 0.212 to 0.937), compared to the stable-low group. There were more women in the recovery group, compared to the stable-low group ( $b = -0.66$ ,  $se = 0.28$ ,  $Wald = 5.42$ ,  $p = 0.033$ , OR 0.519, 95% CI 0.298 to 0.901).

Adjustment disorder were predicted predominantly by sex and risk group. The COVID-19 risk group contributed significantly to belonging to the stable high ( $b = 0.58$ ,  $se = 0.27$ ,  $Wald = 4.67$ ,  $p = 0.030$ , OR 0.56, 95% CI 0.331 to 0.947) and to the exacerbation groups ( $b = 0.70$ ,  $se = 0.31$ ,  $Wald = 5.09$ ,  $p = 0.024$ , OR 0.50, 95% CI 0.272 to 0.912) compared to the stable-low group serving as the reference group. There were more women in the trajectory of stable high ( $b = -0.87$ ,  $se = 0.25$ ,  $Wald = 12.51$ ,  $p < 0.001$ , OR 0.417, 95% CI 0.257 to 0.677), and recovery groups ( $b = -0.66$ ,  $se = 0.22$ ,  $Wald = 9.25$ ,  $p = 0.003$ , OR 0.52, 95% CI 0.338 to 0.791) compared to the stable-low group.

## Differences between the Trajectories and severity of somatic symptoms

A two-way ANOVA showed significant main effects and non-significant interaction effects. A main effect for the anxiety trajectories demonstrated significant differences between the anxiety trajectories in the severity of somatic symptoms  $F(3, 748) = 16.723$ ,  $p < 0.001$ ,  $\eta^2 = 0.04$ . The stable low trajectory ( $M = 8.19$ ,  $SD = 0.34$ ) reported significantly lower severity of somatic symptoms compared to the stable-high ( $M = 13.38$ ,  $SD = 0.93$ ), exacerbation ( $M = 12.34$ ,  $SD = 0.69$ ) and recovery ( $M = 10.02$ ,  $SD = 0.60$ ) trajectories. The differences between the stable-low and both the stable-high (Mean difference =  $-5.19$ ,  $p < 0.001$ ) and exacerbation trajectories (Mean difference =  $-4.15$ ,  $p < 0.001$ ) were greater than the difference between the stable-low and the recovery trajectory (Mean difference =  $-1.89$ ,  $p = 0.050$ ).

An ANOVA for the adjustment disorder trajectories showed significant differences between the trajectories in the severity of somatic symptoms  $F(3, 760) = 17.623$ ,  $p < 0.001$ ,  $\eta^2 = 0.05$ . The stable-low trajectory ( $M = 8.04$ ,  $SD = 0.47$ ) reported significantly lower severity of somatic symptoms compared to the stable-high ( $M = 12.99$ ,  $SD = 0.53$ ), exacerbation ( $M = 12.07$ ,  $SD = 0.82$ ) and recovery ( $M = 10.83$ ,  $SD = 0.80$ ) trajectories. The differences between the stable-low and both the stable-high (Mean difference =  $-4.96$ ,  $p < 0.001$ ) and exacerbation trajectories (Mean difference =  $-4.03$ ,  $p < 0.001$ ) were greater than the difference between the stable-low and the recovery trajectory (Mean difference =  $-2.79$ ,  $p = 0.016$ ).

The interaction between the trajectories of adjustment disorder and the trajectories of anxiety was not significant  $F(9, 748) = 1.467$ ,  $p = 0.156$ ,  $\eta^2 = 0.01$ .

## The role of mental health trajectories in predicting risk for probable somatic symptoms

A logistic regression found that trajectories of both the anxiety and adjustment disorder were associated with somatic symptoms at T2 (Table 2). Participants with a stable high trajectory, exacerbation trajectory or recovery trajectory had substantially higher odds of having somatic symptoms at T2, compared to participants with a low-stable trajectory.

The odds ratio shows that participants with an exacerbation trajectory in adjustment disorder had the highest odds (OR 6.419) of experiencing somatic symptoms at T2, compared to the other trajectories (high stable OR 4.726 and recovery OR 4.666), all as compared to the stable low trajectory. The statistical difference between the strength of the coefficients of the trajectories was not significant (p value ranged from 0.490 to 0.690).

As for the anxiety trajectories, the stable-high trajectory (OR 6.451) and the exacerbation trajectory (OR 5.379) had the highest odds ratio for experiencing somatic symptoms at T2, compared to the recovery trajectory that showed lower odds ratio (OR 2.025), all compared to the group-stable low trajectory. This was reflected further in the statistical difference between the stable-high and the recovery trajectory  $t(1508) = 2.27$ ,  $p = 0.02$  and between the exacerbation and the recovery trajectories  $t(1508) = 2.09$ ,  $p = 0.036$ .

## Discussion

Several studies have suggested that mental health has deteriorated over time in many countries during the pandemic [20-22]. We explored trajectories of anxiety and adjustment disorder before and after the second lockdown during the COVID-19 pandemic in Israel. In line with the existing literature on responses to mass trauma, four types of mental health trajectories were identified: stable-low, stable-high, exacerbation, and recovery groups. These trajectories, with similarities in distribution, have been reported for other disorders including PTSD [23], depression and anxiety [24, 25], in different populations [5].

To date, we know of just one, UK-based, study that has examined trajectories of anxiety and depression over the course of the COVID-19 pandemic [26]. However, this UK study focused on the first lockdown only, averaging data into a single slope. Our analysis of multiple events underscored the complex and non-homogenous reactions to lockdowns. Several demographic variables predicted trajectories of response. Being female was a risk factor for more psychopathological trajectories of anxiety and adjustment disorder symptoms for the stable-high trajectory of adjustment disorder and the recovery trajectory of both anxiety and adjustment disorder. Older age was associated with lower odds of belonging to the stable-high or exacerbation trajectories compared to the stable-low trajectory. Risk group membership was associated with higher odds of belonging to the stable-high group of anxiety and adjustment disorder and to the exacerbation group of adjustment disorder.

The current study showed the association of poor mental health (anxiety and adjustment disorder trajectories) with elevated risk of somatic symptoms burden. For both anxiety and adjustment disorder, affiliation to the stable-high, exacerbation and the recovery T1-T2 trajectories were significantly associated with higher risk for somatic symptoms at T2, compared to the stable-low

1  
2  
3 trajectory. Important to note is that for adjustment disorder the three trajectories were associated  
4 with somatic symptoms at T2 to a similar magnitude. However, for anxiety, the association of  
5 recovery trajectory with somatic symptoms at T2 was significantly lower than the associations of  
6 stable-high and exacerbation trajectories with somatic symptoms at that same time point.  
7 Adjustment disorder refers to a specific stressor of the lockdown and was reflected in all the  
8 three trajectories that differed from the stable-low trajectory. However, the trajectories of anxiety  
9 suggested a more general anxiety construct that is global and not stressor specific. Thus, the  
10 findings show that adjustment disorder manages to capture the consequences of lockdowns more  
11 than anxiety.  
12  
13

14  
15 In line with our hypotheses, the groups with stable-high and exacerbation trajectories (before-  
16 and after – a second lockdown) of anxiety were associated with higher somatic symptoms at T2,  
17 compared to the stable-low group. Huang and his colleagues [9] found in their study in China  
18 during the COVID-19 breakdown that anxious people were likely to have more somatic  
19 symptoms than people without anxiety symptoms. This was also observed through the somatic  
20 symptoms burden among those with higher vulnerability to anxiety [26]. Thus, stress can be  
21 expressed over time through both emotional and somatic roots, implying that researchers and  
22 clinicians should remain open minded regarding the course of symptoms of anxiety and screen  
23 for both anxiety and somatization. High stable anxiety and the elevated levels of arousal that  
24 accompany such stress conditions can change body sensations and produce physiological  
25 changes that may have implications for various symptoms and diseases [27]. Moreover, the  
26 COVID-19 pandemic seemed to trigger specific somatic schemata and thoughts of health/illness  
27 in particular amongst high anxious people with a more vulnerable anxiety trajectory [27].  
28 Finally, amongst highly anxious individuals with a chronic and exacerbated course, there could  
29 be worries that switch between the fear of COVID-19 and the fear of other diseases  
30 (somatization), as was shown by almost an equal amount of people (about 30%) who feared an  
31 infection with COVID-19 and any other disease at the beginning of the pandemic.  
32  
33  
34

35  
36 A similar finding emerged with regard to the trajectories of adjustment disorder; as expected,  
37 groups with chronic/stable-high and delayed/exacerbation trajectories (before- and after – a  
38 second lockdown) of adjustment disorder reported a greater somatic symptoms burden in T2  
39 compared to the stable-low group. One possible explanation might be the multifaceted changes that  
40 the majority of society experienced due to the cumulative lockdown periods. Adaptability to such  
41 rapid and profound change has undoubtedly been a challenging process, suggesting an increase  
42 in the stress levels of many individuals associated with somatic symptoms. In line with this  
43 notion, it was found that a greater number of psychosocial stressors predict greater somatic  
44 symptoms, and that despite the somatic symptoms' high correlation with depression and anxiety,  
45 stressors predict somatic symptoms even while controlling for such variables [28]. In the current  
46 study items for each of the variables of adjustment disorder, anxiety, and somatic symptoms  
47 were distinct, with no overlap between them.  
48  
49

50  
51 Surprisingly, the recovery group-participants with probable mental health problems (anxiety or  
52 adjustment disorder at T1 and no probable mental health at T2), was associated with elevated  
53 risk for a somatic symptoms burden, compared to the resilient/stable-low trajectory. One possible  
54 explanation may be related to the difference between recovery and resilient trajectories [13].  
55 Hence, while recovery implies a healthy pattern, it suggests less adaptive coping as compared to  
56  
57  
58  
59

1  
2  
3 the resilient stable pattern. Indeed, recovery was found to be a vulnerability point that is stress  
4 related and expressed with somatic symptoms. In line with this notion, it might be that the  
5 recovery group achieved relief from their fear and worries after the second lockdown, and were  
6 better able to cope, as they used positive cognitive emotion strategies to reduce their burden.  
7 However, it might be that the duration of employing these strategies was not sufficient as they  
8 reported higher somatic symptoms. It may be speculated that the somatic symptoms are an  
9 indicator of a vicious cycle that may develop in the future between somatization and anxiety.  
10  
11

12 Overall, the present findings report that increased mental health burden was associated with the  
13 second lockdown during the COVID-19 pandemic. The global crisis of COVID-19 confronts  
14 countries with further potential lockdowns. The healthcare system that administered the  
15 lockdown and the politicians and public health officials who mandated it should carefully  
16 consider the need for such action given the costs to certain vulnerable parts of the society. Our  
17 data emphasizes the importance of supporting individuals during lockdown to try to reduce  
18 distress, and the different types of trajectories evident in response to this mass stressor. Our data  
19 also shows individuals adapt to the new strains of life in lockdown. Moreover, the present  
20 findings may point to the importance of identifying and targeting somatic symptoms as  
21 indicators for association with mental health problems. This may be through primary health  
22 physicians who can include somatic symptoms burden screening as part of a patient's visit,  
23 especially during crisis period. This may facilitate the management of mental health problems  
24 during uncertain times such as the COVID-19 pandemic, and in doing so also reduce costs. From  
25 clinical perspective, interventions should thus be specific to the course of time and take into  
26 consideration the specific burden that comes with stress amongst some groups during the  
27 lifespan of a mass stressor.  
28  
29  
30

### 31 32 **Discussion of methodology**

33  
34 We employed an online survey using quota sampling from a probability-based internet panel  
35 representative of the Israeli population. This had several advantages  
36

37 First, internet penetration in Israel as of January 2021 is 88.0% (7.68 million out of 8.72 million)  
38 and percentage of mobile connections in Israel as of January 2021 is 116.9% (10.2 million out of  
39 8.72 million) as some people have more than one mobile phone  
40 (<https://datareportal.com/reports/digital-2021-israel>).  
41  
42

43 Second, online surveys have become important during the COVID-19 pandemic as traditional  
44 survey methods were not feasible [29].  
45

46 Third, obtaining high quality behavioural data or mental health data in a longitudinal design  
47 during COVID-19 pandemic is still scarce [29].  
48  
49

50 Fourth, an online survey enabled us to collect real-time data regarding health and mental health  
51 [29].  
52

53 Fifth online surveys can be created and deployed in very short time in comparison to traditional  
54 surveys [29]. This is particularly important during an ongoing pandemic situation where the  
55  
56  
57  
58  
59  
60

1  
2  
3 number of external factors (e.g., infection rates and governmental responses to these) change  
4 rapidly.  
5

6 Sixth, people feel less reluctant to disclose sensitive information in an online format [30].  
7

8  
9 However, all these benefits come with at the risk of selection bias. Selection bias can be reduced  
10 by using probability panels in countries with high internet penetration and high mobile  
11 connectivity. Using an online survey taken from a probability panel will have higher external  
12 validation and better generalization for the general population in comparison to online surveys  
13 taken from non-probabilistic panel and countries with low internet penetration and mobile  
14 connectivity.  
15

16  
17 To sum, during COVID-19 pandemic, online surveys proved their value in collecting medical  
18 and mental health data. While the problem of selection bias still exists, the benefits and potential  
19 solutions to reduce this bias are justifying the use of online surveys.  
20

## 21 Limitations 22

23  
24 The findings of this study should be considered in the light of several limitations. First is  
25 selection bias. However, using a probability-based internet panel that is weighted and  
26 dynamically adjusted to meet the Israeli Bureau of Statistics in terms of age and sex in a country  
27 with high internet penetration and mobile connections is one way to reduce selection bias.  
28 Second, while random stratified sampling is often preferable in comparison to quota sampling,  
29 the use of robust quota sampling enables a high response rate based for probability-based internet  
30 panel representatives of the Israeli internet user population. This is highly valuable in  
31 longitudinal designs. Contrary to this, use of random stratified sampling tend to yield lower a  
32 response rate. A previous study based on the same probability-based internet panel using a  
33 random stratification sampling led to 31.00% response rate [16] vs. 76.17% response rate in the  
34 current study. We note that a probability sample with low response rate suffers from the same  
35 potential bias as a non-probability sample and therefore enjoys no clear advantage over a quota  
36 sample [31].  
37  
38  
39

40 Study design considerations related to probability panels and real-time assessments can  
41 potentially reduce bias and increase the rigor of online surveys.  
42

43  
44 Most importantly, quota samples that reflect the general population can be deployed when time  
45 constraints exist such as lockdowns during COVID-19 pandemic. Using stratified random  
46 samples before and after a second lockdown could easily lead to missing the time window for  
47 sampling. Moreover, the COVID-19 pandemic increased the homogeneity in the population  
48 related to the shared experience of the pandemic. In such conditions wherein homogeneity  
49 increases, the quota sampling has further advantages, and it was found to have similar estimates  
50 compared to probability sample [32].  
51

52  
53 In addition, we did not have pre COVID-19 assessments of mental health condition. We did not  
54 measure somatic symptoms before the second lockdown was applied (T1). It could be those  
55 somatic symptoms burden exacerbated the mental health symptoms. Earlier somatization  
56  
57  
58  
59



1  
2  
3 symptoms may serve as marker of later stress reactions. Finally, reliance on self-report data may  
4 be liable to recall bias when assessing the occurrence of mental health symptoms.  
5

6  
7 In conclusion, lockdowns should be viewed as multifaceted in terms of medical and mental  
8 health impacts. While lockdowns prevent mass spread of infection, this may be at the cost of  
9 mental health. Our study strengthens the argument that a lockdown during a pandemic is a  
10 double-edged sword.  
11

12  
13 **Acknowledgements** The authors thank the first author University's research authority for the  
14 continuous support for basic research.  
15

### 16 17 **Author Contributions**

18  
19 MBE, RG, YHR and YL designed the study concept. MBE RG YHR EL YL wrote the paper.  
20 MBE, YHR, EL collected the data. MBE and YL conducted the analyses. MBE, YHR, YL  
21 drafted the first version of the manuscript. RG, YHR, EL critically reviewed the manuscript and  
22 had a significant intellectual contribution. Authors read and approve the final manuscript. MBE  
23 and YL had full access to all data (including statistical reports and tables) in the study and can  
24 take responsibility for the integrity of the data and the accuracy of the data analysis.  
25

26  
27 **Funding** YHR was funded by Ariel's University Research Authority internal grant  
28 (RA2000000302).  
29

30  
31 **Competing interests** None declared.  
32

33  
34 **Patient consent for publication** Not required.  
35

36  
37 **Ethics approval** The study was approved by the Ethics Committee of Ariel University  
(AU-SOC-YHR-20200616).  
38

39  
40 **Data availability statement** All data relevant to the study are included in the article is available  
41 upon request to the corresponding author.  
42

### 43 **ORCID iDs**

44  
45 Prof. Menachem Ben-Ezra <https://orcid.org/0000-0002-7890-2069>

46  
47 Prof. Yaira Hamama-Raz <https://orcid.org/0000-0002-0496-6414>

48  
49 Prof. Robin Goodwin <http://orcid.org/0000-0002-2407-7016>

50  
51 Prof. Elazar Leshem <https://orcid.org/0000-0003-3782-9309>

52  
53 Dr. Yafit Levin <https://orcid.org/0000-0001-5907-6569>  
54  
55  
56  
57  
58  
59  
60

## References

- 1 Kazlauskas E, Quero S. Adjustment and coronavirus: How to prepare for COVID-19 pandemic-related adjustment disorder worldwide? *Psychol Trauma* 2020;12(S1):S22-S24.
- 2 Atalan A. Is the lockdown important to prevent the COVID-19 pandemic? Effects on psychology, environment and economy-perspective. *Ann Med Surg* 2020;56:38-42.
- 3 Ben-Ezra M, Sun S, Hou WK, *et al.* The association of being in quarantine and related COVID-19 recommended and non-recommended behaviours with psychological distress in Chinese population. *J Affect Disord* 2020;275:66–8.
- 4 Goodwin R, Hou WK, Sun S, *et al.* Psychological and behavioural responses to COVID-19: A China–Britain comparison. *J Epidemiol Community Health* 2021;75:189-192.
- 5 Galatzer-Levy IR, Huang SH, Bonanno GA. Trajectories of resilience and dysfunction following potential trauma: A review and statistical evaluation. *Clin Psychol Rev* 2018;63:41–55.
- 6 Dragan M, Grajewski P, Shevlin M. Adjustment disorder, traumatic stress, depression and anxiety in Poland during an early phase of the COVID-19 pandemic. *Eur J Psychotraumatol* 2021;12: 1860356.
- 7 Rossi R, Socci V, Talevi D, *et al.* COVID-19 pandemic and lockdown measures impact on mental health among the general population in Italy. *Front Psychiatry* 2020;11:790.
- 8 Shevlin M, Nolan E, Owczarek M, *et al.* COVID-19-related anxiety predicts somatic symptoms in the UK population. *Br J Health Psychol* 2020;25:875-82.
- 9 Huang Y, Wang Y, Zeng L, *et al.* Prevalence and correlation of anxiety, insomnia and somatic symptoms in a Chinese population during the COVID-19 epidemic. *Front Psychiatry* 2020;11:568329.
10. Creed FH, Davies I, Jackson J, *et al.* The epidemiology of multiple somatic symptoms. *J Psychosom Res* 2012;72:311-7.
11. Hinz, A. Ernst J, Glaesmer H, *et al.* Frequency of somatic symptoms in the general population: Normative values for the Patient Health Questionnaire-15 (PHQ-15). *J Psychosom Res* 2017;96:27-31.
- 12 Beutel ME, Wiltink J, Kerahrodi JG, *et al.* Somatic symptom load in men and women from middle to high age in the Gutenberg Health Study-association with psychosocial and somatic factors. *Sci Rep* 2019;9:4610.
13. Bonanno GA. Loss, trauma, and human resilience: Have we underestimated the human capacity to thrive after extremely aversive events? *Am Psychol* 2004;59:20-8.

14. Bonanno GA, Wortman CB, Lehman DR, *et al.* Resilience to loss and chronic grief: a prospective study from preloss to 18-months postloss. *J Pers Soc Psychol* 2002;83:1150-64.
15. Demidenko E. Sample size and optimal design for logistic regression with binary interaction. *Stat Med* 2008;27:36-46.
- 16 Bodas M, Siman-Tov M, Kreitler S, *et al.* The Role of Victimization in Shaping Households' Preparedness for Armed Conflicts in Israel. *Disaster Med Public Health Prep* 2018;12:67-75.
- 17 Spitzer RL, Kroenke K, Williams JB, *et al.* A brief measure for assessing generalized anxiety disorder: the GAD-7. *Arch Intern Med* 2006;166:1092-7.
- 18 Shevlin M, Hyland P, Ben-Ezra M, *et al.* Measuring ICD-11 adjustment disorder: the development and initial validation of the International Adjustment Disorder Questionnaire. *Acta Psychiatr Scand* 2020;141:265-74.
- 19 Gierk B, Kohlmann S, Kroenke K, *et al.* The somatic symptom scale-8 (SSS-8): a brief measure of somatic symptom burden. *JAMA Intern Med* 2014;174:399-407.
- 20 Tay AK, Rees S, Steel Z, *et al.* Six-year trajectories of post-traumatic stress and severe psychological distress symptoms and associations with timing of trauma exposure, ongoing adversity and sense of injustice: a latent transition analysis of a community cohort in conflict-affected Timor-Leste. *BMJ Open* 2016;6:e010205.
21. Jia R, Ayling K, Chalder T, *et al.* Mental health in the UK during the COVID-19 pandemic: cross-sectional analyses from a community cohort study. *BMJ Open* 2020;10:e040620.
22. Holmes EA, O'Connor RC, Perry VH. *et al.* Tracey, I., Wessely, S., Arseneault, L., ... & Bullmore, E. Multidisciplinary research priorities for the COVID-19 pandemic: a call for action for mental health science. *Lancet Psychiatry* 2020;7:547-60.
- 23 Solomon Z, Bachem R, Levin Y, *et al.* Long-Term Trajectories of Posttraumatic Stress Disorder: Categorical versus Continuous Assessment. *Psychiatry* 2018;81:376-90.
- 24 Bonanno GA, Kennedy P, Galatzer-Levy IR, *et al.* Trajectories of resilience, depression, and anxiety following spinal cord injury. *Rehabil Psychol* 2012;57:236-47.
25. Li G, Jiang Z, Kang X, *et al.* Trajectories and predictors of anxiety and depression amongst infertile women during their first IVF/ICSI treatment cycle. *Psychosom Res* 2021;142:110357.
- 26 Fancourt D, Steptoe A, Bu F. Trajectories of anxiety and depressive symptoms during enforced isolation due to COVID-19: longitudinal analyses of 36,520 adults in England. *Lancet Psychiatry* 2021;8:141-9.
- 27 Ran L, Wang W, Ai M, *et al.* Psychological resilience, depression, anxiety, and somatization symptoms in response to COVID-19: A study of the general population in China at the peak of its epidemic. *Soc Sci Med* 2020;262:113261.

1  
2  
3  
4 28 Haftgoli N, Favrat B, Verdon F, *et al*. Patients presenting with somatic complaints in general  
5 practice: depression, anxiety and somatoform disorders are frequent and associated with  
6 psychosocial stressors. *BMC Fam Pract* 2010;11:67  
7

8  
9 29 Hlatshwako TG, Shah SJ, Kosana P, *et al*. Online health survey research during COVID-19.  
10 *Lancet Digit Health* 2021;3:e76-e77.  
11

12 30 Gnambis T, Kaspar K. Disclosure of sensitive behaviors across self-administered survey  
13 modes: a meta-analysis. *Behav Res* 2015;47:1237–1259.  
14

15 31 Brick M. The Future of Survey Sampling. *Public Opin Q* 2011;75:872-888.  
16

17 32 Yang K, Banamah A. Quota sampling as an alternative to probability sampling? An  
18 experimental study. *Sociol Res Online* 2014;19:56-66.  
19  
20  
21  
22  
23  
24  
25  
26  
27  
28  
29  
30  
31  
32  
33  
34  
35  
36  
37  
38  
39  
40  
41  
42  
43  
44  
45  
46  
47  
48  
49  
50  
51  
52  
53  
54  
55  
56  
57  
58  
59  
60

## Tables

Table 1. Participant demographics (n = 1029) and Israeli population values

|                                                           | <b>Participants<br/>(n = 1029)</b> | <b>Israel population (N = 9,291,000)</b>                    |
|-----------------------------------------------------------|------------------------------------|-------------------------------------------------------------|
|                                                           | n (%)                              | n (%)                                                       |
| <b>Sex</b>                                                |                                    |                                                             |
| Male                                                      | 509 (49.5 %)                       | 49.7%                                                       |
| Female                                                    | 520 (50.5%)                        | 50.3%                                                       |
| <b>Age groups (years)*</b>                                |                                    |                                                             |
| 18-22                                                     | 180 (13.3%)                        | 10.1%                                                       |
| 23-29                                                     | 218 (16.1%)                        | 15.9%                                                       |
| 30-39                                                     | 291 (21.5%)                        | 24%                                                         |
| 40-49                                                     | 240 (17.8%)                        | 20%                                                         |
| 50+                                                       | 422 (31.2%)                        | 30%                                                         |
| <b>Education</b>                                          |                                    |                                                             |
| Elementary school                                         | 9 (.7%)                            | 1.9%                                                        |
| High school no diploma                                    | 132 (9.2%)                         | 8%                                                          |
| Graduate high school with diploma                         | 312 (23.1%)                        | 22% ( <b>Graduate high school/ with diploma 42%</b> )       |
| higher education with no diploma                          | 292 (21.6%)                        | 17%                                                         |
| undergraduate diploma                                     | 386 (28.6%)                        | 20% ( <b>Higher diploma - academic/not academic 50.9%</b> ) |
| post graduate diploma                                     | 220 (16.3%)                        | 11%                                                         |
| <b>Income</b>                                             |                                    |                                                             |
|                                                           |                                    | <b>Mean income 13,558 NIS (2,570 GBP)</b>                   |
| much below average                                        | 281 (21.1%)                        | 26.9%                                                       |
| a little below average                                    | 237 (17.8%)                        | N/A                                                         |
| about average                                             | 332 (24.9%)                        | 34.1% (based on incomes from all resources to a household)  |
| a little above average                                    | 355 (26.7%)                        | N/A <b>above average – 28%</b>                              |
| much above average                                        | 127 (9.5%)                         | N/A                                                         |
| <b>Marital Status</b>                                     |                                    |                                                             |
| Single                                                    | 431 (31.9%)                        | 30%                                                         |
| Married                                                   | 796 (58.9%)                        | 61%                                                         |
| Divorced                                                  | 107 (7.9%)                         | 6%                                                          |
| Separated                                                 | 9 (.7%)                            | 1%                                                          |
| Widowed                                                   | 8 (.6%)                            | 2%                                                          |
| <b>COVID-19 Risk Group according to the WHO criteria.</b> |                                    |                                                             |
| Yes                                                       | 240 (23.3%)                        | N/A                                                         |
| No                                                        | 789 (76.7%)                        | N/A                                                         |

Notes. Israel population estimates from Office for National Statistics, end year estimates 2018.

Table 2. Logistic Regression of Factors Predicting Somatic Symptoms burden by SSS-8 (score  $\geq 12$ )

|                                                                                                                                     | n   | (%)  | b        | SE    | Wald   | p    | OR (95% C.I)          |
|-------------------------------------------------------------------------------------------------------------------------------------|-----|------|----------|-------|--------|------|-----------------------|
| Age                                                                                                                                 |     |      | -.00     | .01   | .49    | .486 | .994 (.978, 1.011)    |
| Sex (reference group: Men)                                                                                                          | 365 | 48.8 | .45*     | .23   | 4.02   | .045 | 1.574 (1.010, 2.454)  |
| Relationship status (reference group: not in a committed relationship)                                                              | 299 | 39.1 | -.42     | .25   | 2.92   | .088 | .654 (.402, 1.065)    |
| Education                                                                                                                           |     |      | .16      | .10   | 2.62   | .105 | 1.170 (.968, 1.416)   |
| <b>Income (Monthly Average: 2,570 GBP) (reference group: much lower than average) <sup>a</sup> (n= 1014), <sup>b</sup> (n= 756)</b> | 157 | 20.5 |          |       |        |      |                       |
| A little below average                                                                                                              | 126 | 16.5 | -.10     | .34   | .09    | .764 | .903 (.463-1.759)     |
| About average                                                                                                                       | 193 | 25.3 | -.52     | .33   | 2.51   | .113 | .594 (.312-1.131)     |
| A little above average                                                                                                              | 203 | 26.6 | -.24     | .33   | .52    | .469 | .790 (.418-1.494)     |
| Much higher than average                                                                                                            | 77  | 10.1 | -.28     | .43   | .43    | .513 | .754 (.323-1.760)     |
| Being in Risk Group for COVID-19 (reference group: not in risk)                                                                     | 581 | 76.0 | -.27     | .26   | 1.08   | .298 | .761 (.454-1.274)     |
| <b>Trajectories over T1-T2</b>                                                                                                      |     |      |          |       |        |      |                       |
| <b>GAD-7 Anxiety (reference group: stable low trajectory)</b>                                                                       | 597 | 78.0 |          |       | 41.291 |      |                       |
| Stable high trajectory                                                                                                              | 41  | 5.4  | 1.864*** | 0.389 | 22.993 | .000 | 6.451 (3.011, 13.822) |
| Exacerbation trajectory                                                                                                             | 57  | 7.5  | 1.682*** | 0.333 | 25.575 | .000 | 5.379 (2.802, 10.325) |
| Recovery trajectory                                                                                                                 | 69  | 9.0  | .705*    | 0.329 | 4.591  | .032 | 2.025 (1.062, 3.861)  |
| <b>ICD-11 probable Adjustment Disorder by IADQ (reference group: stable low trajectory)</b>                                         | 545 | 71.3 |          |       | 52.853 |      |                       |
| Stable high trajectory                                                                                                              | 90  | 11.8 | 1.553*** | 0.303 | 26.306 | .000 | 4.726 (2.611, 8.555)  |
| Exacerbation trajectory                                                                                                             | 61  | 8.0  | 1.859*** | 0.329 | 31.988 | .000 | 6.419 (3.370, 12.227) |
| Recovery trajectory                                                                                                                 | 68  | 8.9  | 1.540*** | 0.320 | 23.161 | .000 | 4.666 (2.492, 8.739)  |

Note: \*  $p \leq .05$ ; \*\*  $p \leq .01$ ; \*\*\*  $p \leq .001$ . <sup>a</sup>Actual n = 1014; <sup>b</sup>Actual n = 756.

SSS = Somatic Severity Scale; GAD= General Anxiety disorder; IADQ = International Adjustment Disorder Questionnaire.

1  
2  
3  
4  
5  
6 Figure 1. Trajectories of Anxiety symptoms over time

7  
8 *Notes.* Four different trajectories were identified for probable anxiety.  
9

10  
11 Figure 2. Trajectories of Adjustment disorder symptoms over time

12  
13 *Notes.* Four different trajectories were identified for probable anxiety.  
14  
15  
16  
17  
18  
19  
20  
21  
22  
23  
24  
25  
26  
27  
28  
29  
30  
31  
32  
33  
34  
35  
36  
37  
38  
39  
40  
41  
42  
43  
44  
45  
46  
47

1  
2  
3  
4  
5  
6  
7  
8  
9  
10  
11  
12  
13  
14  
15  
16  
17  
18  
19  
20  
21  
22  
23  
24  
25  
26  
27  
28  
29  
30  
31  
32  
33  
34  
35  
36  
37  
38  
39  
40  
41  
42  
43  
44  
45  
46  
47  
48  
49  
50  
51  
52  
53  
54  
55  
56  
57  
58  
59  
60

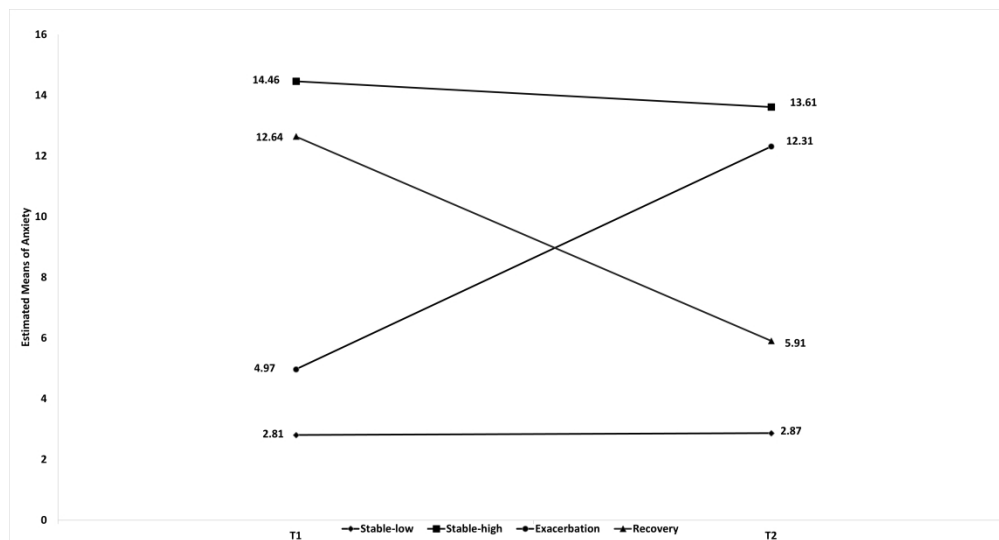

Figure 1. Trajectories of Anxiety symptoms over time

1046x560mm (130 x 130 DPI)



1  
2  
3  
4  
5  
6  
7  
8  
9  
10  
11  
12  
13  
14  
15  
16  
17  
18  
19  
20  
21  
22  
23  
24  
25  
26  
27  
28  
29  
30  
31  
32  
33  
34  
35  
36  
37  
38  
39  
40  
41  
42  
43  
44  
45  
46  
47  
48  
49  
50  
51  
52  
53  
54  
55  
56  
57  
58  
59  
60

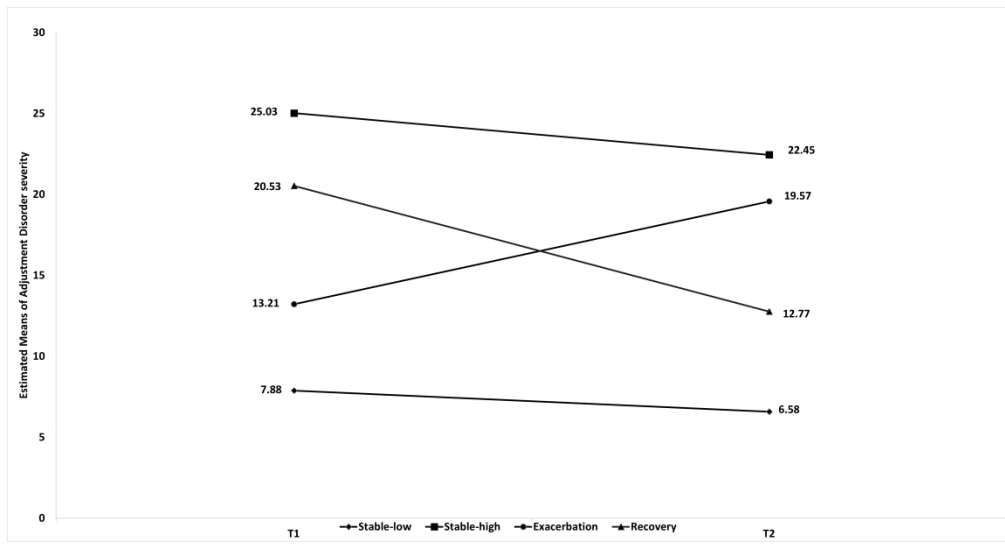

Figure 2. Trajectories of Adjustment disorder symptoms over time

1046x560mm (130 x 130 DPI)

**STROBE 2007 (v4) Statement—Checklist of items that should be included in reports of *cohort studies***

| Section/Topic                | Item # | Recommendation                                                                                                                                                                       | Reported on page # |
|------------------------------|--------|--------------------------------------------------------------------------------------------------------------------------------------------------------------------------------------|--------------------|
| <b>Title and abstract</b>    | 1      | (a) Indicate the study's design with a commonly used term in the title or the abstract                                                                                               | 1                  |
|                              |        | (b) Provide in the abstract an informative and balanced summary of what was done and what was found                                                                                  | 2                  |
| <b>Introduction</b>          |        |                                                                                                                                                                                      |                    |
| Background/rationale         | 2      | Explain the scientific background and rationale for the investigation being reported                                                                                                 | 3-4                |
| Objectives                   | 3      | State specific objectives, including any prespecified hypotheses                                                                                                                     | 4                  |
| <b>Methods</b>               |        |                                                                                                                                                                                      |                    |
| Study design                 | 4      | Present key elements of study design early in the paper                                                                                                                              | 4                  |
| Setting                      | 5      | Describe the setting, locations, and relevant dates, including periods of recruitment, exposure, follow-up, and data collection                                                      | 4                  |
| Participants                 | 6      | (a) Give the eligibility criteria, and the sources and methods of selection of participants. Describe methods of follow-up                                                           | 4-5 (Yafit)        |
|                              |        | (b) For matched studies, give matching criteria and number of exposed and unexposed                                                                                                  |                    |
| Variables                    | 7      | Clearly define all outcomes, exposures, predictors, potential confounders, and effect modifiers. Give diagnostic criteria, if applicable                                             | 5-6                |
| Data sources/<br>measurement | 8*     | For each variable of interest, give sources of data and details of methods of assessment (measurement). Describe comparability of assessment methods if there is more than one group | 5-6                |
| Bias                         | 9      | Describe any efforts to address potential sources of bias                                                                                                                            | Yafit              |
| Study size                   | 10     | Explain how the study size was arrived at                                                                                                                                            | Yafit              |
| Quantitative variables       | 11     | Explain how quantitative variables were handled in the analyses. If applicable, describe which groupings were chosen and why                                                         |                    |
| Statistical methods          | 12     | (a) Describe all statistical methods, including those used to control for confounding                                                                                                | 5-6                |
|                              |        | (b) Describe any methods used to examine subgroups and interactions                                                                                                                  | 5-6                |
|                              |        | (c) Explain how missing data were addressed                                                                                                                                          | 5-6                |
|                              |        | (d) If applicable, explain how loss to follow-up was addressed                                                                                                                       | 5-6                |
|                              |        | (e) Describe any sensitivity analyses                                                                                                                                                | 5-6                |
| <b>Results</b>               |        |                                                                                                                                                                                      |                    |

|                          |     |                                                                                                                                                                                                                                                                                                                                                                                                               |                                                                                |
|--------------------------|-----|---------------------------------------------------------------------------------------------------------------------------------------------------------------------------------------------------------------------------------------------------------------------------------------------------------------------------------------------------------------------------------------------------------------|--------------------------------------------------------------------------------|
| Participants             | 13* | (a) Report numbers of individuals at each stage of study—eg numbers potentially eligible, examined for eligibility, confirmed eligible, included in the study, completing follow-up, and analysed<br>(b) Give reasons for non-participation at each stage<br>(c) Consider use of a flow diagram                                                                                                               | Yafit (page 4?)<br>Yafit (page4 ?)<br>No Need                                  |
| Descriptive data         | 14* | (a) Give characteristics of study participants (eg demographic, clinical, social) and information on exposures and potential confounders<br>(b) Indicate number of participants with missing data for each variable of interest<br>(c) Summarise follow-up time (eg, average and total amount)                                                                                                                | Yafit<br>Yafit (we have it in table 1) Maybe should add to the paper?<br>Yafit |
| Outcome data             | 15* | Report numbers of outcome events or summary measures over time                                                                                                                                                                                                                                                                                                                                                |                                                                                |
| Main results             | 16  | (a) Give unadjusted estimates and, if applicable, confounder-adjusted estimates and their precision (eg, 95% confidence interval). Make clear which confounders were adjusted for and why they were included<br>(b) Report category boundaries when continuous variables were categorized<br>(c) If relevant, consider translating estimates of relative risk into absolute risk for a meaningful time period | Yafit<br>Yafit<br>Yafit                                                        |
| Other analyses           | 17  | Report other analyses done—eg analyses of subgroups and interactions, and sensitivity analyses                                                                                                                                                                                                                                                                                                                | Yafit (Page 4?)                                                                |
| <b>Discussion</b>        |     |                                                                                                                                                                                                                                                                                                                                                                                                               |                                                                                |
| Key results              | 18  | Summarise key results with reference to study objectives                                                                                                                                                                                                                                                                                                                                                      | Page 7-8                                                                       |
| <b>Limitations</b>       |     |                                                                                                                                                                                                                                                                                                                                                                                                               |                                                                                |
| Interpretation           | 20  | Give a cautious overall interpretation of results considering objectives, limitations, multiplicity of analyses, results from similar studies, and other relevant evidence                                                                                                                                                                                                                                    | Page 8                                                                         |
| Generalisability         | 21  | Discuss the generalisability (external validity) of the study results                                                                                                                                                                                                                                                                                                                                         | Page 8                                                                         |
| <b>Other information</b> |     |                                                                                                                                                                                                                                                                                                                                                                                                               |                                                                                |
| Funding                  | 22  | Give the source of funding and the role of the funders for the present study and, if applicable, for the original study on which the present article is based                                                                                                                                                                                                                                                 | Page 8-9                                                                       |

\*Give information separately for cases and controls in case-control studies and, if applicable, for exposed and unexposed groups in cohort and cross-sectional studies.

1  
2 **Note:** An Explanation and Elaboration article discusses each checklist item and gives methodological background and published examples of transparent reporting. The STROBE  
3 checklist is best used in conjunction with this article (freely available on the Web sites of PLoS Medicine at <http://www.plosmedicine.org/>, Annals of Internal Medicine at  
4 <http://www.annals.org/>, and Epidemiology at <http://www.epidem.com/>). Information on the STROBE Initiative is available at [www.strobe-statement.org](http://www.strobe-statement.org).  
5  
6  
7  
8  
9  
10  
11  
12  
13  
14  
15  
16  
17  
18  
19  
20  
21  
22  
23  
24  
25  
26  
27  
28  
29  
30  
31  
32  
33  
34  
35  
36  
37  
38  
39  
40  
41  
42  
43  
44  
45  
46

For peer review only
